# Supplementary material for: NHC ligand-powered palladium-catalyzed carbonylative C–S bond cleavage of vinyl sulfides: efficient access totert-butyl arylacrylates
Source: Royal Society of Chemistry journal article supplement (doi:10.1039/d0ob02043e), 2020-01-01

Supporting Information For:

## **NHC Ligand-Powered Palladium-Catalyzed Carbonylative C-S Bond Cleavage of Vinyl Sulfides: Efficient Access to *tert*-Butyl Arylacrylates**

Jian-Xing Xu<sup>†</sup>, Fengqian Zhao<sup>‡</sup>, and Xiao-Feng Wu<sup>\*\*†‡</sup>

Dalian National Laboratory for Clean Energy, Dalian Institute of Chemical Physics, Dalian, Liaoning, 116023, China

Leibniz-Institut für Katalyse an der Universität Rostock e. V., Albert-Einstein-Straße 29a, 18059 Rostock, Germany

Phone: (+49)-0381-1281-343; E-Mail: xiao-feng.wu@catalysis.de

## General Information

Unless otherwise noted, materials were purchased from commercial suppliers (Sigma-Aldrich, TCI, ABCR and Acros) and used without further purification. Flash column chromatography was performed using 200-300 mesh silica gel.  $^1\text{H}$  NMR spectra were recorded on Bruker Avance III HD 300 NMR (300 MHz) or ARX 400 NMR (400 MHz) spectrometers spectrophotometers at ambient temperature. Chemical shifts are reported in ppm relative to tetramethylsilane (TMS) with the solvent resonance employed as the internal standard ( $\text{CDCl}_3$ :  $\delta = 7.26$  ppm).  $^{13}\text{C}$  NMR was recorded at 75 MHz or 100 MHz: chemical shifts are reported in ppm from tetramethylsilane (TMS) with the solvent resonance as the internal standard ( $\text{CDCl}_3$ :  $\delta = 77.0$  ppm). Data for  $^1\text{H}$  are reported as follows: chemical shift ( $\delta$  ppm), multiplicity (s = singlet, d = doublet, t = triplet, q = quartet, quint = quintet, m = multiplet, br = broad), coupling constant (Hz), and integration. Coupling constants are reported to 0.5 or 1 Hz accuracy. Electron impact (EI) mass spectra were recorded on AMD 402 mass spectrometer (70 eV). High resolution mass spectra (HR-MS) were recorded on Agilent 6210. The data were given as mass units per charge (m/z). Gas chromatography analysis was performed on an Agilent HP-5890 instrument with a FID detector and HP-5 capillary column (polydimethylsiloxane with 5 % phenyl groups, 30 m, 0.32 mm i.d., 0.25  $\mu\text{m}$  film thickness) using argon as carrier gas. The preparation of Bis(arylvinyl)sulfides was carried out easily according to reported methods<sup>1</sup>.

**Table S1. Identification of the Optimal Reaction Conditions**

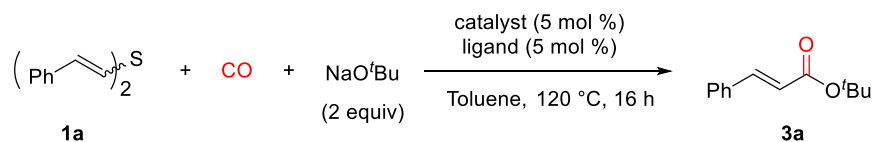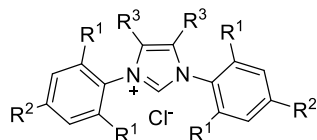

**IPr·HCl**, R<sup>1</sup> = *i*Pr, R<sup>2</sup> = R<sup>3</sup> = H

**IMes·HCl**, R<sup>1</sup> = R<sup>2</sup> = Me, R<sup>3</sup> = H

**MeIPr·HCl**, R<sup>1</sup> = *i*Pr, R<sup>2</sup> = H, R<sup>3</sup> = Me

**MeIMes·HCl**, R<sup>1</sup> = R<sup>2</sup> = R<sup>3</sup> = Me

| Entry | [Pd]                       | Ligand                 | Base                | Additive                  | Solvent            | T (°C) | CO (bar) | Yield(%) |
|-------|----------------------------|------------------------|---------------------|---------------------------|--------------------|--------|----------|----------|
| 1     | Pd(OAc) <sub>2</sub>       | PPh <sub>3</sub>       | NaO <sup>t</sup> Bu | -                         | Toluene            | 120    | 1        | -        |
| 2     | Pd(OAc) <sub>2</sub>       | PCy <sub>3</sub>       | NaO <sup>t</sup> Bu | -                         | Toluene            | 120    | 1        | -        |
| 3     | Pd(OAc) <sub>2</sub>       | BuPAd <sub>2</sub>     | NaO <sup>t</sup> Bu | -                         | Toluene            | 120    | 1        | -        |
| 4     | Pd(OAc) <sub>2</sub>       | dppp                   | NaO <sup>t</sup> Bu | -                         | Toluene            | 120    | 1        | trace    |
| 5     | Pd(OAc) <sub>2</sub>       | XantPhos               | NaO <sup>t</sup> Bu | -                         | Toluene            | 120    | 1        | -        |
| 6     | Pd(OAc) <sub>2</sub>       | DPEPhos                | NaO <sup>t</sup> Bu | -                         | Toluene            | 120    | 1        | trace    |
| 7     | Pd(OAc) <sub>2</sub>       | RuPhos                 | NaO <sup>t</sup> Bu | -                         | Toluene            | 120    | 1        | -        |
| 8     | Pd(OAc) <sub>2</sub>       | XPhos                  | NaO <sup>t</sup> Bu | -                         | Toluene            | 120    | 1        | -        |
| 9     | Pd(OAc) <sub>2</sub>       | IPr·HCl                | NaO <sup>t</sup> Bu | -                         | Toluene            | 120    | 1        | 40       |
| 10    | Pd(OAc) <sub>2</sub>       | IMes·HCl               | NaO <sup>t</sup> Bu | -                         | Toluene            | 120    | 1        | 38       |
| 11    | Pd(OAc) <sub>2</sub>       | <sup>Me</sup> IPr·HCl  | NaO <sup>t</sup> Bu | -                         | Toluene            | 120    | 1        | 27       |
| 12    | Pd(OAc) <sub>2</sub>       | <sup>Me</sup> IMes·HCl | NaO <sup>t</sup> Bu | -                         | Toluene            | 120    | 1        | 31       |
| 13    | Pd(OAc) <sub>2</sub>       | IPr·HCl                | NaO <sup>t</sup> Bu | -                         | Toluene            | 120    | 6        | 37       |
| 14    | Pd(OAc) <sub>2</sub>       | IPr·HCl                | KO <sup>t</sup> Bu  | -                         | Toluene            | 120    | 1        | 8        |
| 15    | Pd(OAc) <sub>2</sub>       | IPr·HCl                | LiO <sup>t</sup> Bu | -                         | Toluene            | 120    | 1        | -        |
| 16    | Pd(OAc) <sub>2</sub>       | IPr·HCl                | NaO <sup>t</sup> Bu | -                         | 1,4-dioxane        | 120    | 1        | trace    |
| 17    | Pd(OAc) <sub>2</sub>       | IPr·HCl                | NaO <sup>t</sup> Bu | -                         | THF                | 120    | 1        | trace    |
| 18    | Pd(OAc) <sub>2</sub>       | IPr·HCl                | NaO <sup>t</sup> Bu | -                         | CH <sub>3</sub> CN | 120    | 1        | -        |
| 19    | Pd(OAc) <sub>2</sub>       | IPr·HCl                | NaO <sup>t</sup> Bu | -                         | DMF                | 120    | 1        | -        |
| 20    | Pd(OAc) <sub>2</sub>       | IPr·HCl                | NaO <sup>t</sup> Bu | -                         | DMAc               | 120    | 1        | -        |
| 21    | Pd(OAc) <sub>2</sub>       | IPr·HCl                | NaO <sup>t</sup> Bu | -                         | <i>o</i> -Xylene   | 120    | 1        | 41       |
| 22    | Pd(OAc) <sub>2</sub>       | IPr·HCl                | NaO <sup>t</sup> Bu | FeCl <sub>3</sub> 1 equiv | Toluene            | 120    | 1        | trace    |
| 23    | Pd(OAc) <sub>2</sub>       | IPr·HCl                | NaO <sup>t</sup> Bu | CuI 1 equiv               | Toluene            | 120    | 1        | -        |
| 24    | Pd(OAc) <sub>2</sub>       | IPr·HCl                | NaO <sup>t</sup> Bu | LiOH 0.5 equiv            | Toluene            | 120    | 1        | 34       |
| 25    | Pd(dba) <sub>2</sub>       | IPr·HCl                | NaO <sup>t</sup> Bu | -                         | Toluene            | 120    | 1        | 32       |
| 26    | PdCl <sub>2</sub>          | IPr·HCl                | NaO <sup>t</sup> Bu | -                         | Toluene            | 120    | 1        | 30       |
| 27    | [Pd(allyl)Cl] <sub>2</sub> | IPr·HCl                | NaO <sup>t</sup> Bu | -                         | Toluene            | 120    | 1        | 8        |
| 28    | Pd-PEPPSI-IPr              | -                      | NaO <sup>t</sup> Bu | -                         | Toluene            | 120    | 1        | 45       |
| 29    | Pd-PEPPSI-IPr              | -                      | NaO <sup>t</sup> Bu | -                         | Toluene            | 140    | 1        | 30       |
| 30    | Pd-PEPPSI-IPr              | dppp                   | NaO <sup>t</sup> Bu | -                         | Toluene            | 120    | 1        | 72       |

## General Procedure for Reductive Borylation of CO

A 4 mL screw-cap vial was charged with Pd-PEPPSI-IPr (5 mol%), dppp (5 mol%), bis(arylvinyl)sulfide (0.2 mmol), sodium *tert*-butoxide (0.4 mmol) and an oven-dried stirring bar. The vial was closed by Teflon septum and phenolic cap and connected with atmosphere with a needle. After flashed the vials with argon and vacuum three times, dry toluene (2 mL) was injected by syringe. The vial was fixed in an alloy plate and put into Paar 4560 series autoclave (300 mL) under argon atmosphere. At room temperature, the autoclave is flushed with carbon monoxide for three times and 1 bar of carbon monoxide was charged. The autoclave was reacted at 120°C for 16 hours. After the reaction had finished, the autoclave was cooled down to room temperature and flushed with nitrogen for three times. The reaction mixture was diluted with DCM and passed through a short pad of Celite. After evaporation of the solvent, the residue was adsorbed on silica gel and the crude product was purified by column chromatography using *n*-pentane/diethyl ether.

### *tert*-(*E*)-Butyl cinnamate (2a)<sup>2</sup>

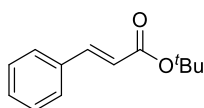

Yellow oil (26.5 mg, 65% yield). <sup>1</sup>H NMR (300 MHz, CDCl<sub>3</sub>) δ 7.59 (d, *J* = 16.0 Hz, 1H), 7.53 – 7.48 (m, 2H), 7.39 – 7.33 (m, 3H), 6.37 (d, *J* = 16.0 Hz, 1H), 1.54 (s, 9H). <sup>13</sup>C NMR (75 MHz, CDCl<sub>3</sub>) δ 166.3, 143.5, 134.7, 130.0, 128.8, 128.0, 120.2, 80.5, 28.2. GC-MS (EI, 70 eV): *m/z* (%) = 204 (10), 147 (100), 131 (70), 103 (40), 77 (35).

### *tert*-Butyl (*E*)-3-(*p*-tolyl) acrylate (2b)<sup>2</sup>

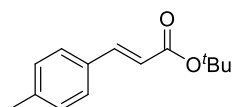

Yellow oil (19.6 mg, 45% yield). <sup>1</sup>H NMR (300 MHz, CDCl<sub>3</sub>) δ 7.56 (d, *J* = 16.0 Hz, 1H), 7.40 (d, *J* = 8.5 Hz, 2H), 7.17 (d, *J* = 8.0 Hz, 2H), 6.32 (d, *J* = 16.0 Hz, 1H), 2.36 (s, 3H). <sup>13</sup>C NMR (75 MHz, CDCl<sub>3</sub>) δ 166.6, 143.6, 140.3, 131.9, 129.6, 128.0, 119.1, 80.4, 28.2, 21.4. GC-MS (EI, 70 eV): *m/z* (%) = 218 (15), 162 (100), 145 (60), 115 (55), 91 (25), 57 (25).

### *tert*-Butyl (*E*)-3-(3,5-dimethylphenyl) acrylate (2c)<sup>3</sup>

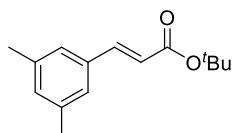

Yellow oil (20.9 mg, 45% yield). <sup>1</sup>H NMR (400 MHz, CDCl<sub>3</sub>) δ 7.53 (d, *J* = 16.0 Hz, 1H), 7.12 (s, 2H), 7.00 (s, 1H), 6.34 (d, *J* = 16.0 Hz, 1H), 2.32 (s, 6H), 1.53 (s, 9H). <sup>13</sup>C NMR (75 MHz, CDCl<sub>3</sub>) δ 166.5, 143.8, 138.3, 134.6, 131.7, 125.8, 119.8, 80.3, 28.2, 21.2. GC-MS (EI, 70 eV): *m/z* (%) = 232 (20), 176 (70), 161 (100), 115 (35).

***tert*-Butyl (*E*)-3-(2-fluorophenyl) acrylate (2d)<sup>4</sup>**

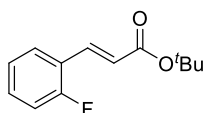

Yellow oil (20.7 mg, 47% yield). <sup>1</sup>H NMR (400 MHz, CDCl<sub>3</sub>) δ 7.72 (d, *J* = 16.0 Hz, 1H), 7.52 (td, *J* = 7.5, 1.5 Hz, 1H), 7.37 – 7.30 (m, 1H), 7.14 (td, *J* = 7.5, 1.5 Hz, 1H), 7.11 – 7.05 (m, 1H), 6.46 (d, *J* = 16.0 Hz, 1H), 1.54 (s, 9H). <sup>13</sup>C NMR (75 MHz, CDCl<sub>3</sub>) δ 166.1, 161.3 (d, *J* = 253.5 Hz), 136.1 (d, *J* = 3.0 Hz), 131.3 (d, *J* = 9.0 Hz), 129.0 (d, *J* = 3.0 Hz), 124.4 (d, *J* = 4.0 Hz), 122.8 (d, *J* = 6.5 Hz), 122.7 (d, *J* = 12.5 Hz), 116.1 (d, *J* = 22.0 Hz), 80.7, 28.2. GC-MS (EI, 70 eV): *m/z* (%) = 222 (10), 166 (60), 149 (100), 118 (70), 101 (70), 75 (35), 57 (75).

***tert*-Butyl (*E*)-3-(3-fluorophenyl) acrylate (2e)<sup>4</sup>**

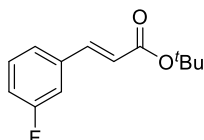

Yellow oil (23.5 mg, 53% yield). <sup>1</sup>H NMR (300 MHz, CDCl<sub>3</sub>) δ 7.53 (d, *J* = 16.0 Hz, 1H), 7.34 (td, *J* = 8.0, 5.5 Hz, 1H), 7.29 – 7.24 (m, 1H), 7.23 – 7.17 (m, 1H), 7.09 – 7.01 (m, 1H), 6.36 (d, *J* = 16.0 Hz, 1H), 1.53 (s, 9H). <sup>13</sup>C NMR (75 MHz, CDCl<sub>3</sub>) δ 165.9, 163.0 (d, *J* = 246.4 Hz), 142.1 (d, *J* = 2.7 Hz), 136.9 (d, *J* = 7.9 Hz), 130.4 (d, *J* = 8.2 Hz), 123.9 (d, *J* = 2.8 Hz), 121.6, 116.8 (d, *J* = 21.5 Hz), 114.2 (d, *J* = 21.7 Hz), 80.8, 28.2. GC-MS (EI, 70 eV): *m/z* (%) = 222 (10), 166 (75), 149 (100), 121 (40), 101 (55), 75 (25), 57 (75).

***tert*-Butyl (*E*)-3-(2-chlorophenyl) acrylate (2f)<sup>5</sup>**

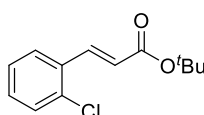

Yellow oil (30.4 mg, 64% yield). <sup>1</sup>H NMR (400 MHz, CDCl<sub>3</sub>) δ 8.00 (d, *J* = 16.0 Hz, 1H), 7.62 – 7.58 (m, 1H), 7.45 – 7.38 (m, 1H), 7.31 – 7.23 (m, 2H), 6.36 (d, *J* = 16.0 Hz, 1H), 1.54 (s, 9H). <sup>13</sup>C NMR (75 MHz, CDCl<sub>3</sub>) δ 165.8, 139.3, 134.8, 132.9, 130.7, 130.1, 127.6, 127.0, 122.8, 80.8, 28.2. GC-MS (EI, 70 eV): *m/z* (%) = 238 (5), 182 (10), 165 (35), 147 (100), 101 (30), 57 (40).

***tert*-Butyl (*E*)-3-(4-chlorophenyl) acrylate (2g)<sup>2</sup>**

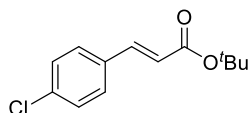

White solid (30.2 mg, 63% yield). <sup>1</sup>H NMR (300 MHz, CDCl<sub>3</sub>) δ 7.53 (d, *J* = 16.0 Hz, 1H), 7.47 – 7.39 (m, 2H), 7.37 – 7.30 (m, 2H), 6.34 (d, *J* = 16.0 Hz, 1H), 1.53 (s, 9H). <sup>13</sup>C NMR (75 MHz, CDCl<sub>3</sub>) δ 166.1, 142.1, 135.8, 133.2, 129.1, 120.8, 80.7, 28.2. GC-MS (EI, 70 eV): *m/z* (%) = 238 (10), 182 (100), 165 (60), 137 (20), 102 (35), 57 (45).

***tert*-Butyl (*E*)-3-(3,4-dichlorophenyl) acrylate (2h)<sup>6</sup>**

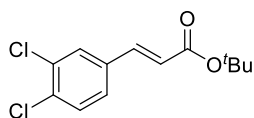

White solid (35.4 mg, 65% yield). <sup>1</sup>H NMR (300 MHz, CDCl<sub>3</sub>) δ 7.58 (d, *J* = 2.0 Hz, 1H), 7.46 (d, *J* = 16.0 Hz, 1H), 7.44 (d, *J* = 8.5 Hz, 1H), 7.32 (dd, *J* = 8.5, 2.0 Hz, 1H), 6.35 (d, *J* = 16.0 Hz, 1H), 1.53 (s, 9H). <sup>13</sup>C NMR (75 MHz, CDCl<sub>3</sub>) δ 165.6, 140.8, 134.7, 133.8, 133.2, 130.8, 129.5, 126.9, 122.1, 81.0, 28.2. GC-MS (EI, 70 eV): *m/z* (%) = 272 (10), 216 (100), 199 (55), 136 (45), 57 (55).

***tert*-Butyl (*E*)-3-(4-(trifluoromethyl)phenyl) acrylate (2i)<sup>2</sup>**

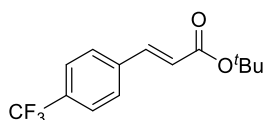

Colorless oil (30.2 mg, 55% yield). <sup>1</sup>H NMR (300 MHz, CDCl<sub>3</sub>) δ 7.66 – 7.55 (m, 5H), 6.44 (d, *J* = 16.0 Hz, 1H), 1.54 (s, 9H). <sup>13</sup>C NMR (75 MHz, CDCl<sub>3</sub>) δ 165.7, 141.6, 138.1, 131.5 (d, *J* = 32.5 Hz), 128.0, 125.8 (q, *J* = 3.8 Hz), 123.9 (d, *J* = 272.0 Hz), 122.8, 81.0, 28.2. GC-MS (EI, 70 eV): *m/z* (%) = 272 (5), 217 (45), 199 (100), 171 (30), 151 (70), 57 (85), 41 (40).

***tert*-Butyl (*E*)-3-(naphthalen-1-yl) acrylate (2j)<sup>4</sup>**

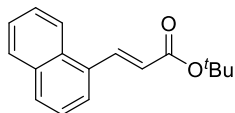

Colorless oil (34.1 mg, 67% yield). <sup>1</sup>H NMR (300 MHz, CDCl<sub>3</sub>) δ 8.44 (d, *J* = 16.0 Hz, 1H), 8.20 (d, *J* = 8.0 Hz, 1H), 7.92 – 7.84 (m, 2H), 7.74 (d, *J* = 7.0 Hz, 1H), 7.60 – 7.42 (m, 3H), 6.47 (d, *J* = 16.0 Hz, 1H), 1.59 (s, 9H). <sup>13</sup>C NMR (75 MHz, CDCl<sub>3</sub>) δ 166.2, 140.6, 133.7, 132.1, 131.4, 130.2, 128.7, 126.7, 126.2, 125.5, 124.9, 123.5, 122.9, 80.6, 28.3. GC-MS (EI, 70 eV): *m/z* (%) = 254 (15), 198 (25), 181 (20), 153 (100).

***tert*-Butyl (*E*)-3-(naphthalen-2-yl) acrylate (2k)<sup>6</sup>**

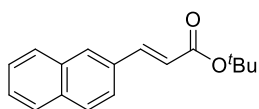

Colorless oil (27.2 mg, 53% yield). <sup>1</sup>H NMR (300 MHz, CDCl<sub>3</sub>) δ 7.91 (s, 1H), 7.87 – 7.80 (m, 3H), 7.76 (d, *J* = 16.0 Hz, 1H), 7.66 (dd, *J* = 8.5, 1.5 Hz, 1H), 7.56 – 7.46 (m, 2H), 6.50 (d, *J* = 16.0 Hz, 1H), 1.57 (s, 9H). <sup>13</sup>C NMR (75 MHz, CDCl<sub>3</sub>) δ 166.3, 143.5, 134.1, 133.3, 132.1, 129.6, 129.5, 128.6, 128.5, 127.7, 127.0, 126.6, 123.6, 120.4, 80.5, 28.2. GC-MS (EI, 70 eV): *m/z* (%) = 254 (20), 198 (100), 181 (35), 152 (60).

***tert*-Butyl (*E*)-3-(thiophen-3-yl) acrylate (2l)<sup>8</sup>**

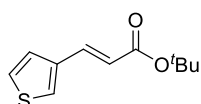

Yellow oil (29.9 mg, 71% yield). <sup>1</sup>H NMR (300 MHz, CDCl<sub>3</sub>) δ 7.57 (d, *J* = 15.9 Hz, 1H), 7.51 – 7.41 (m, 1H), 7.35 – 7.30 (m, 1H), 7.29 – 7.24 (m, 1H), 6.19 (d, *J* = 15.9 Hz, 1H), 1.52 (s, 9H). <sup>13</sup>C NMR (75 MHz, CDCl<sub>3</sub>) δ

166.6, 137.1, 129.5, 127.4, 126.8, 125.2, 119.9, 80.4, 28.2. **GC-MS** (EI, 70 eV): m/z (%) = 210 (20), 154 (100), 137 (70), 112 (40), 57 (35).

**tert-Butyl (E)-3-(pyridin-3-yl) acrylate (2m)**<sup>8</sup>

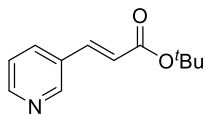

Colorless oil (27.6 mg, 67% yield) <sup>1</sup>H NMR (300 MHz, CDCl<sub>3</sub>) δ 8.71 (d, *J* = 2.5 Hz, 1H), 8.57 (dd, *J* = 5.0, 1.5 Hz, 1H), 7.80 (dt, *J* = 8.0, 2.0 Hz, 1H), 7.55 (d, *J* = 16.0 Hz, 1H), 7.30 (dd, *J* = 8.0, 5.0 Hz, 1H), 6.42 (d, *J* = 16.0 Hz, 1H), 1.53 (s, 9H). <sup>13</sup>C NMR (75 MHz, CDCl<sub>3</sub>) δ 165.5, 150.7, 149.6, 139.7, 134.1, 130.4, 123.6, 122.4, 80.9, 28.1. **GC-MS** (EI, 70 eV): m/z (%) = 212 (100), 178 (40), 167 (25), 134 (30), 121 (30), 91 (30), 77 (50).

**Reference:**

1. Paradies, J. *Synthesis* **2010**, 2010, 947-952.
2. Zhu, M.-K.; Zhao, J.-F.; Loh, T.-P. *Org. Lett.* **2011**, 13, 6308-6311.
3. Lipshutz, B. H.; Ghorai, S.; Leong, W. W. Y.; Taft, B. R.; Krogstad, D. V. *J. Org. Chem.* **2011**, 76, 5061-5073.
4. de Vries, A. H. M.; Mulders, J. M. C. A.; Mommers, J. H. M.; Henderickx, H. J. W.; de Vries, J. G. *Org. Lett.* **2003**, 5, 3285-3288.
5. Armstrong, A.; Ferguson, A. *Beilstein J. Org. Chem.* **2012**, 8, 1747-1752.
6. Choudary, B. M.; Mahendar, K.; Kantam, M. L.; Ranganath, K. V. S.; Athar, T. *Adv. Synth. Catal.* **2006**, 348, 1977-1985.
7. Jung, Y. C.; Mishra, R. K.; Yoon, C. H.; Jung, K. W. *Org. Lett.* **2003**, 5, 2231-2234.
8. Sanjaykumar, S. R.; Mukri, B. D.; Patil, S.; Madras, G.; Hegde, M. S. *J. Chem. Sci.* **2011**, 123, 47-54.

# NMR Spectra of products: $^1\text{H}$ , $^{13}\text{C}$ NMR

Jianxing Xu JXU-511518 — PROTON CDCl<sub>3</sub> {C:\Bruker\TopSpin3.6.0} 2007 49 — 300.20MHz

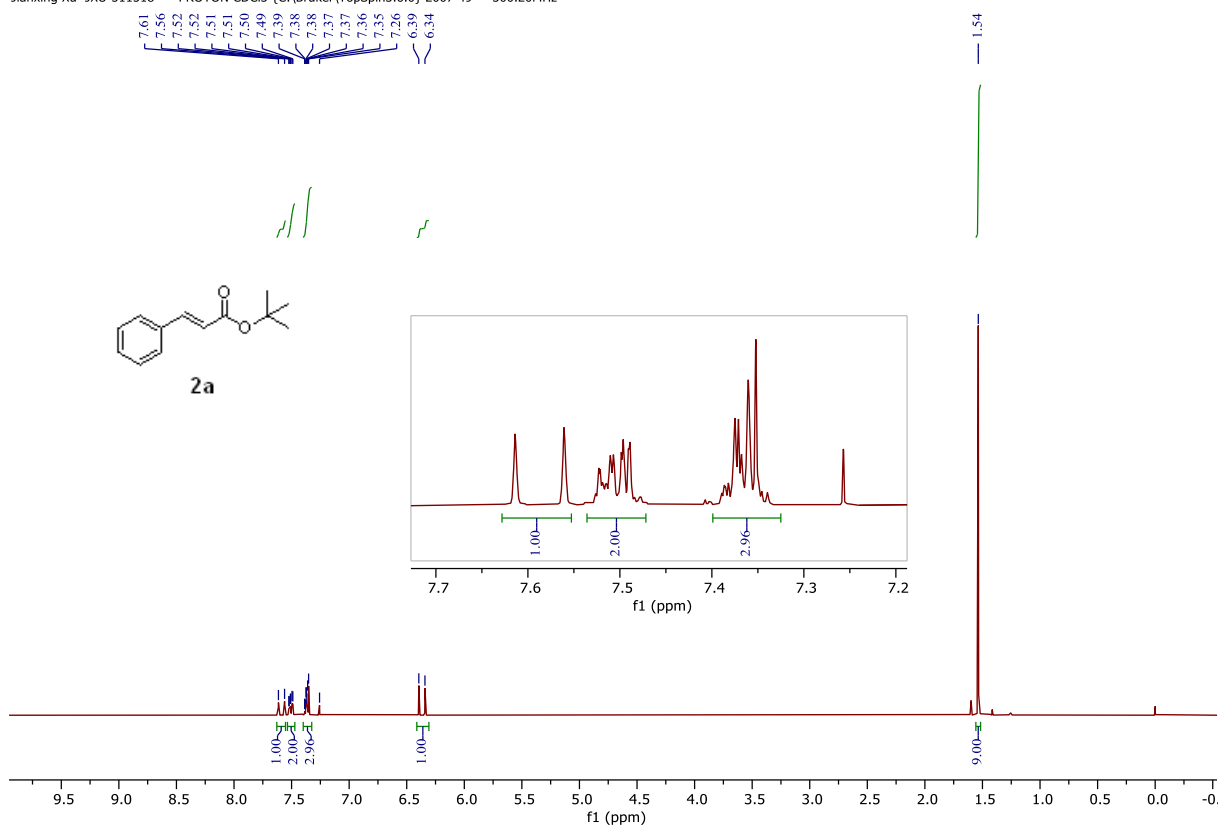

Jianxing Xu JXU-511518  
C13CPD CDCl<sub>3</sub> {C:\Bruker\TopSpin3.6.0} 2007 49  
75.49MHz

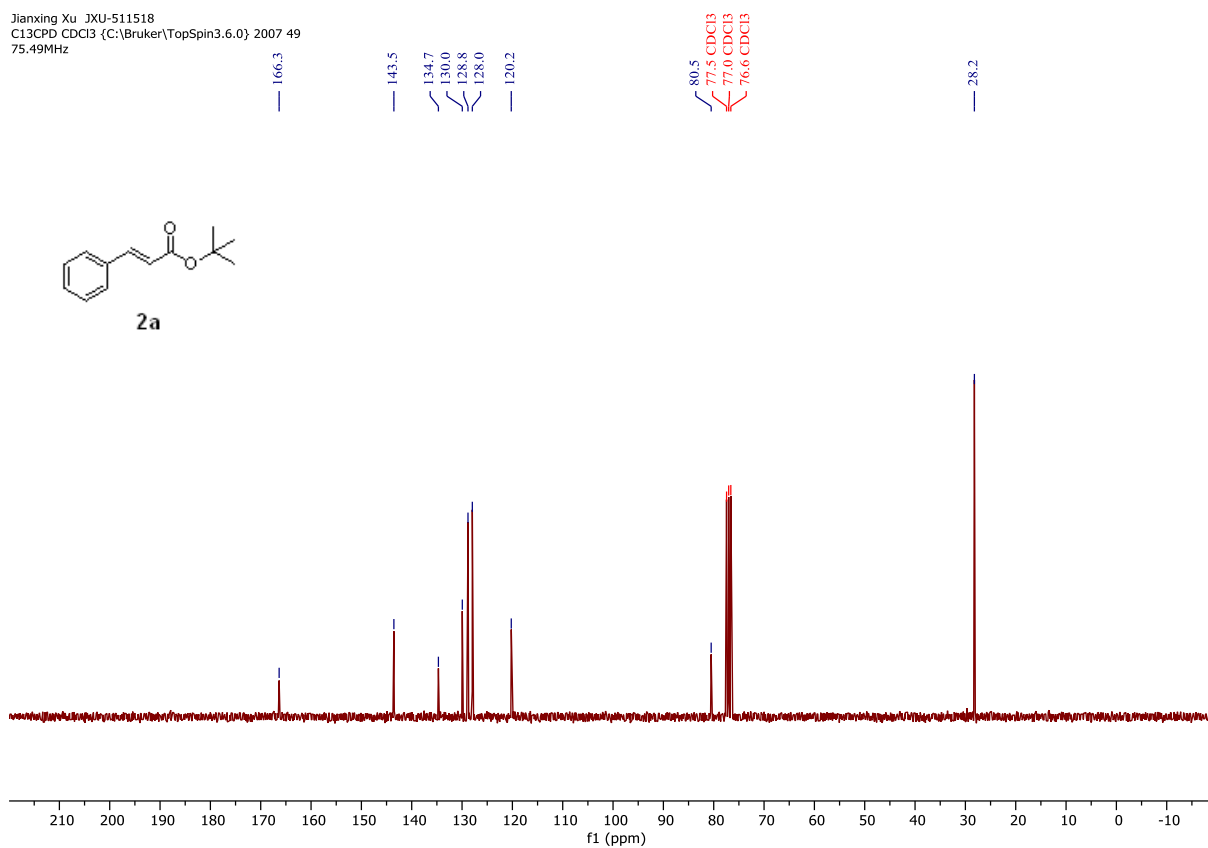



Jianxing Xu JXU-511907 — PROTON CDCl3 {C:\Bruker\TopSpin3.6.0} 2008 12 — 300.20MHz

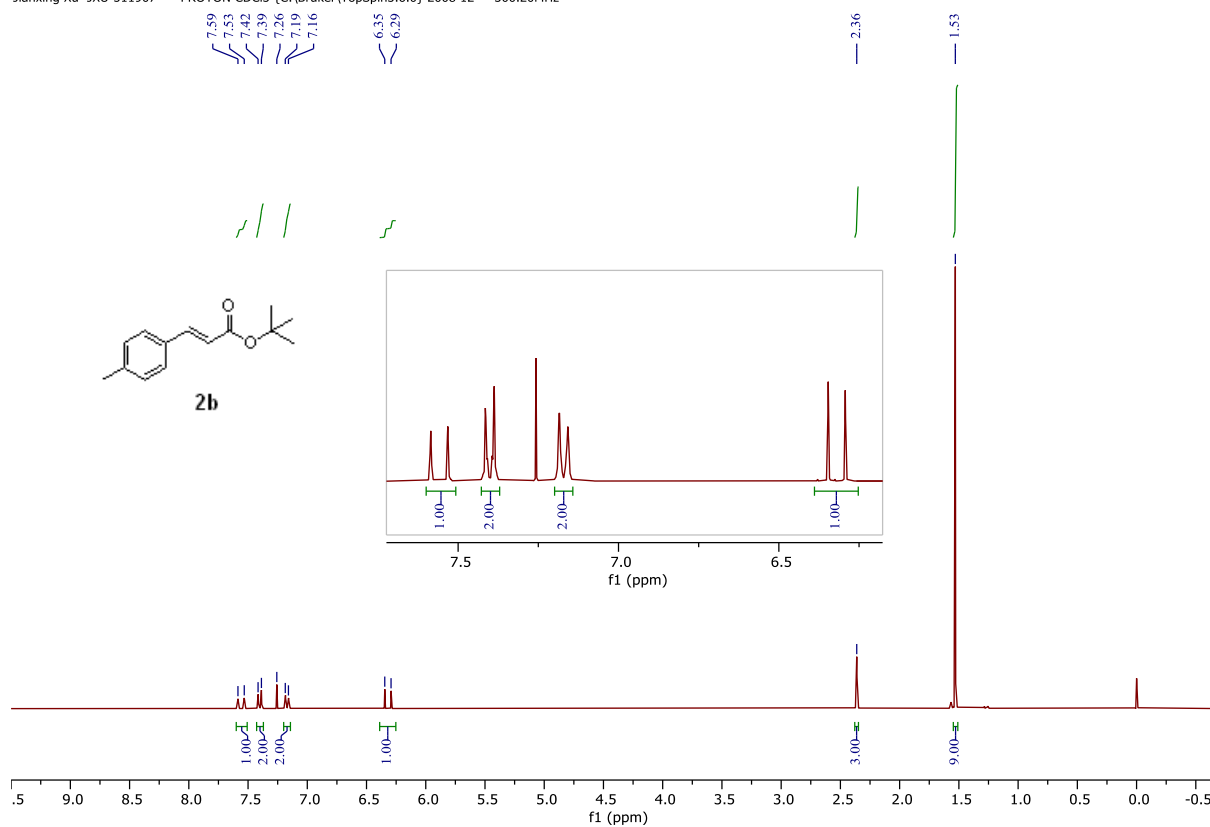

Jianxing Xu, JXU-511907  
Au13C CDCl3 {C:\Bruker\TopSpin3.6.0} 2008 39  
75.48MHz

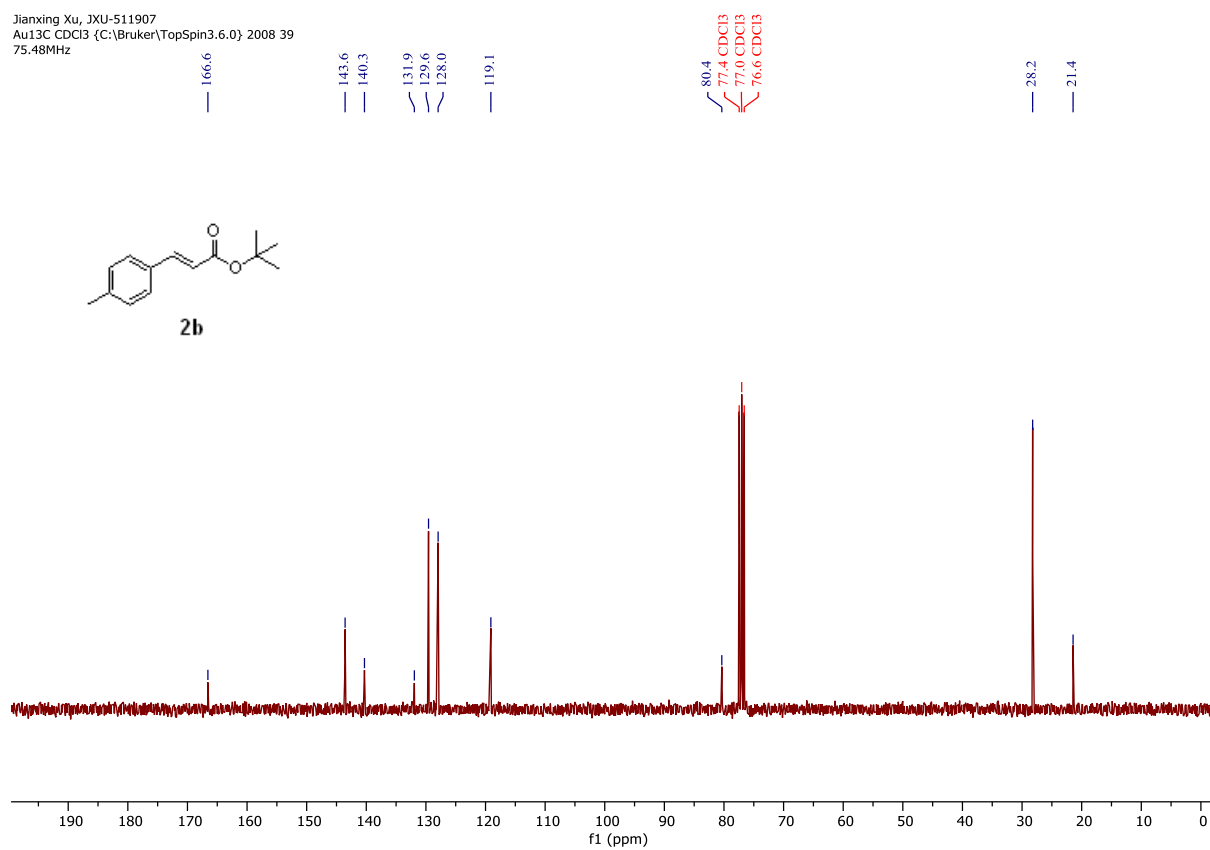

Jianxing Xu JXU-511909 — Au1H CDCl3 {C:\Bruker\TopSpin3.5pl6} 2008 15 — 400.13MHz

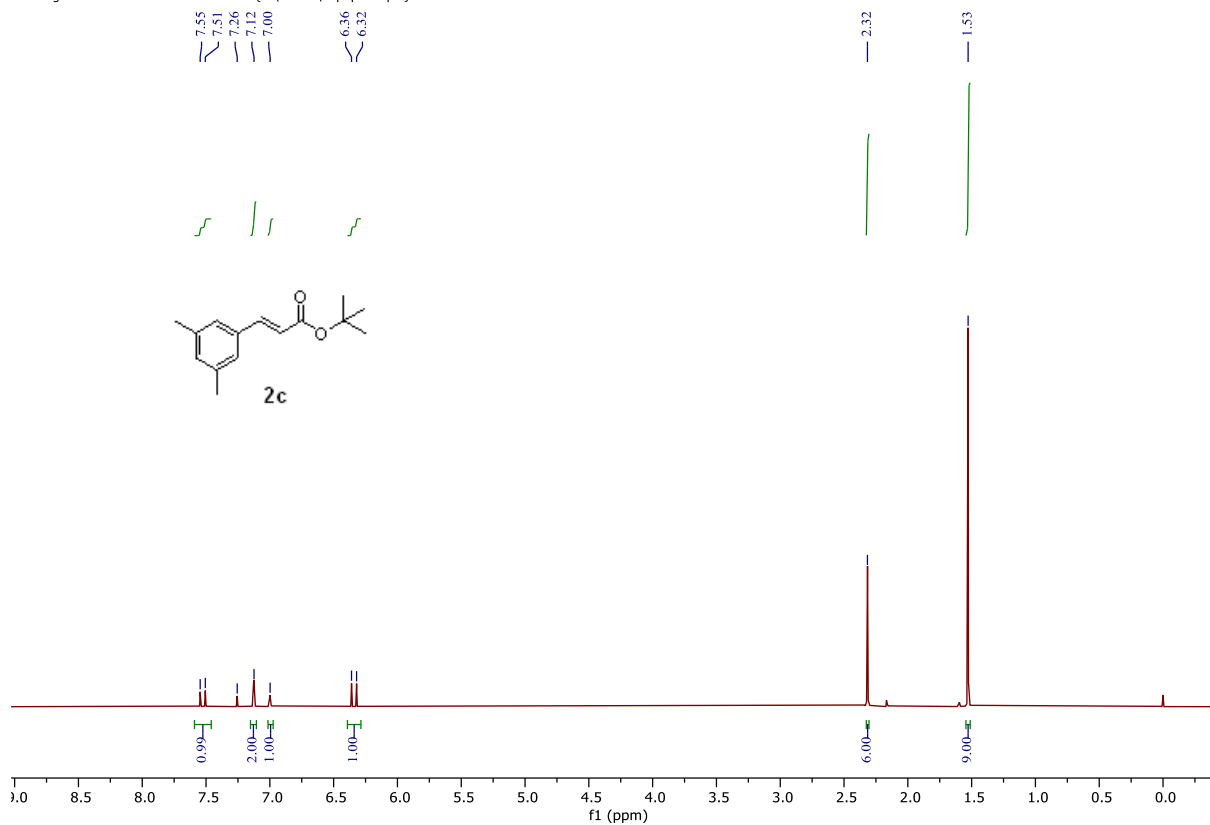

Jianxing Xu JXU-511909  
C13CPD CDCl3 {C:\Bruker\TopSpin3.6.0} 2008 22  
75.49MHz

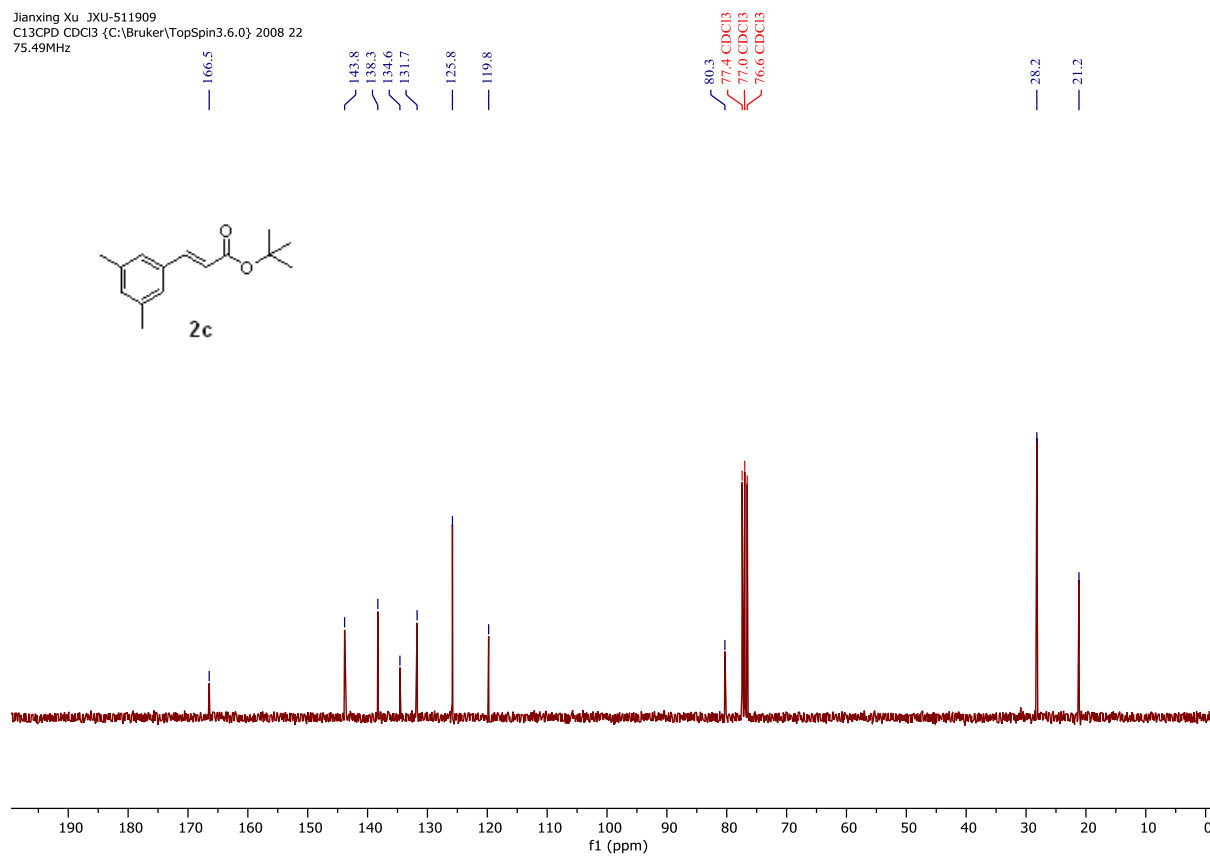

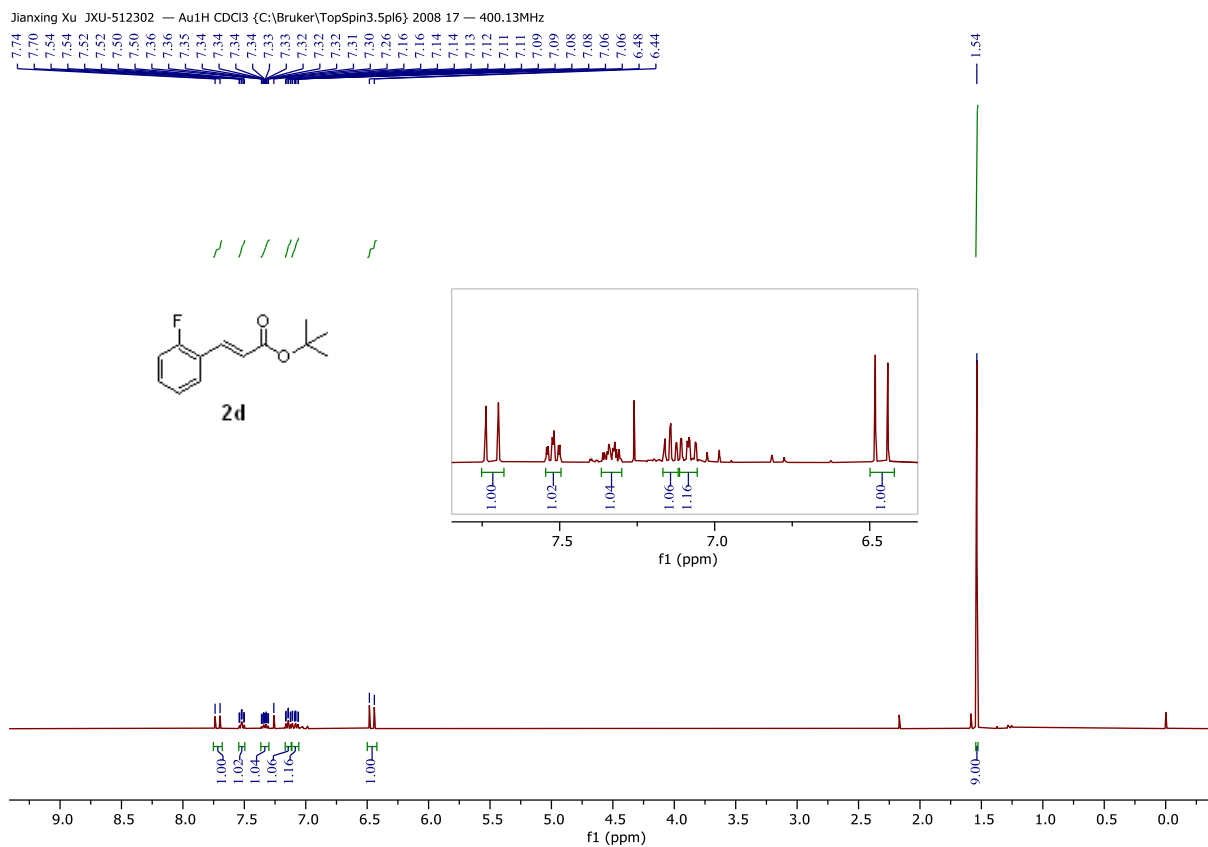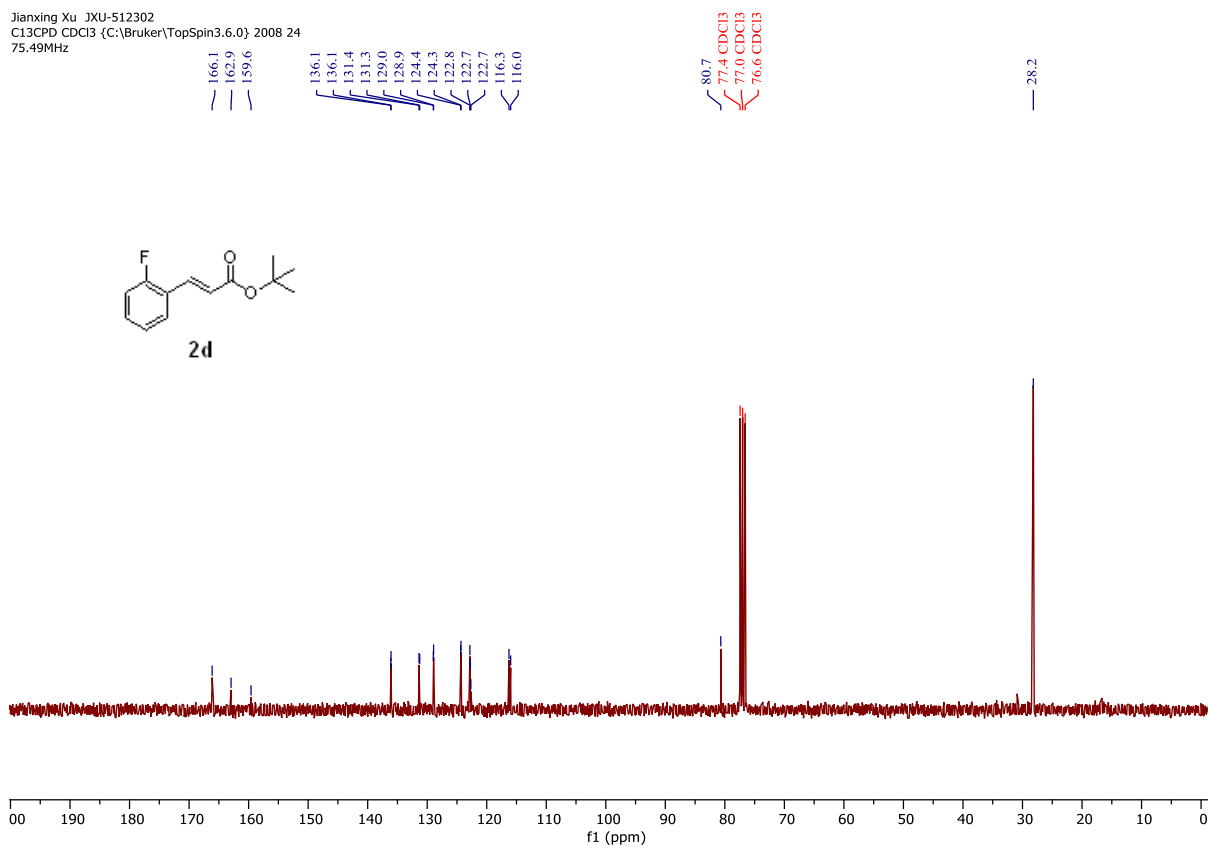

Jianxing Xu JXU-512504 — Au1H CDCl3 {C:\Bruker\TopSpin3.6.0} 2008 8 — 300.13MHz

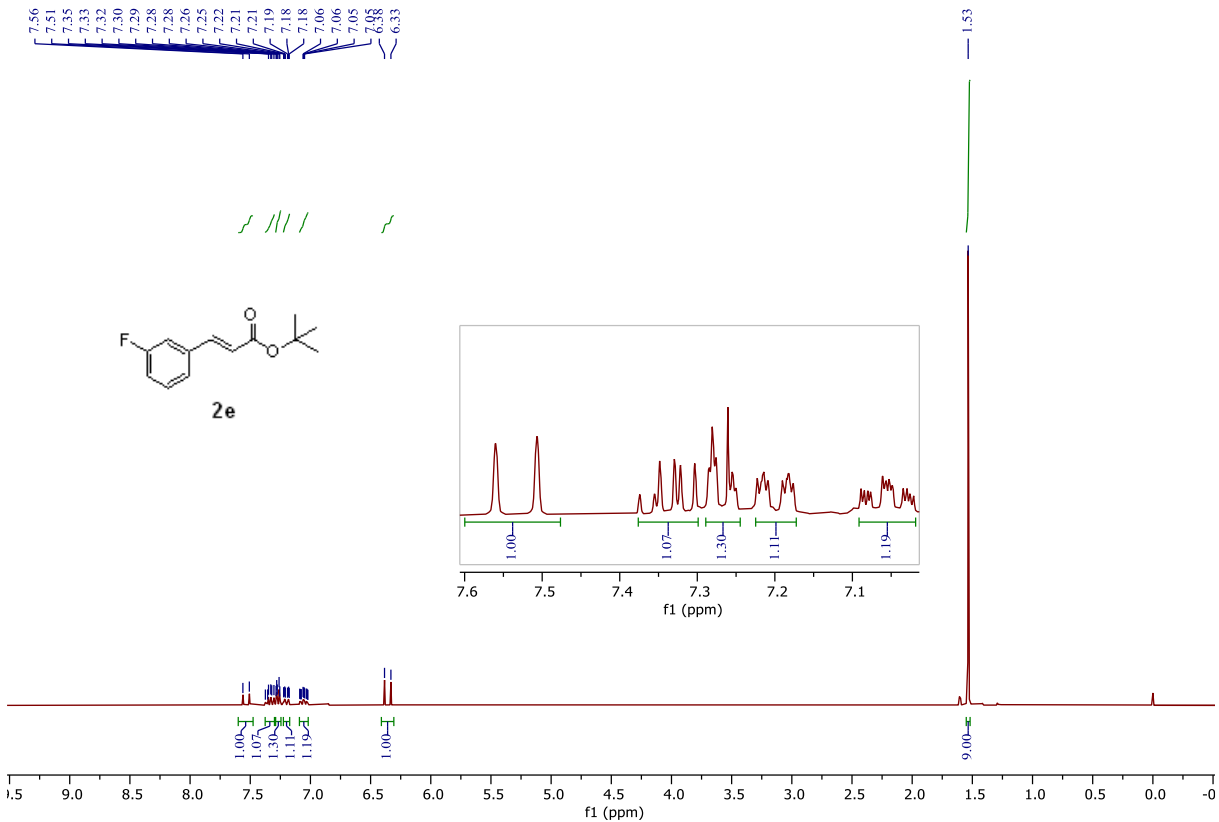

Jianxing Xu JXU-512504  
Au13C CDCl3 {C:\Bruker\TopSpin3.6.0} 2008 18  
75.48MHz

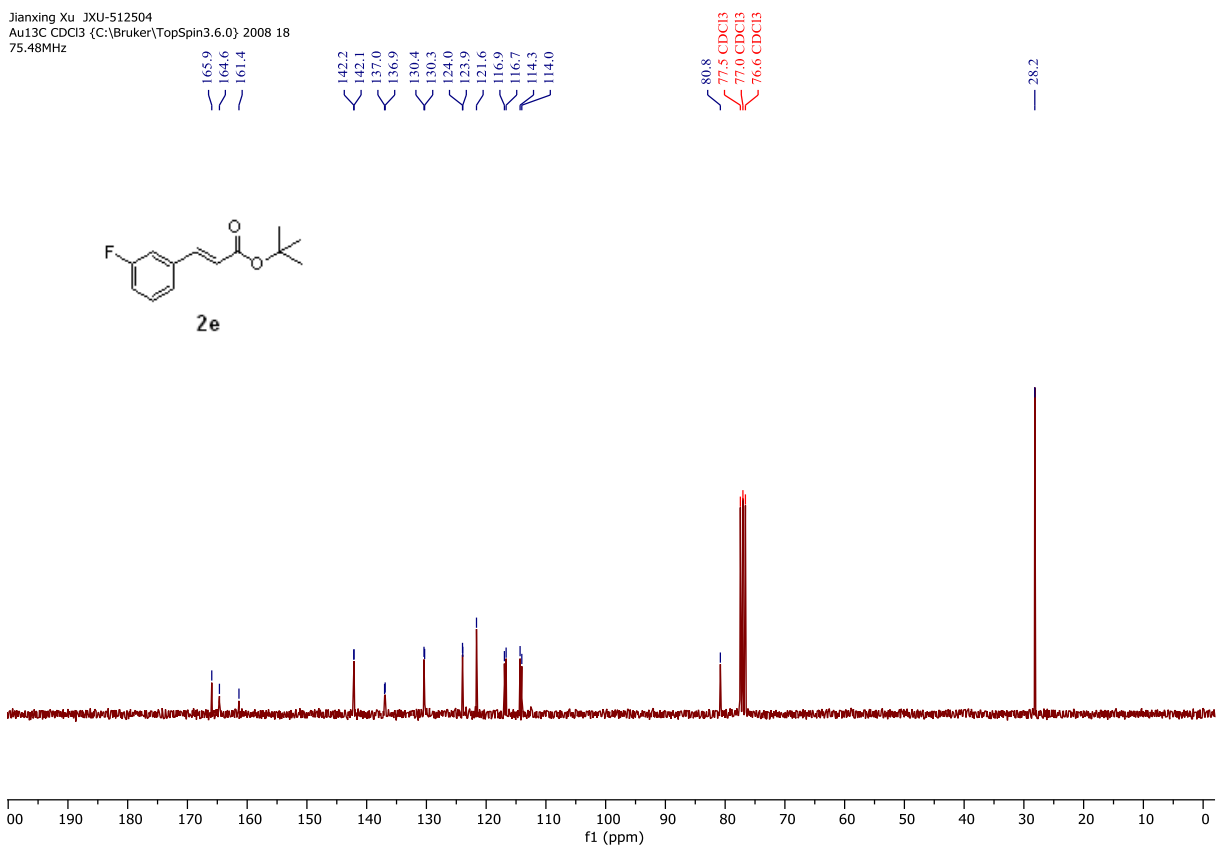

Jianxing Xu JXU-512301 — Au1H CDCl3 {C:\Bruker\TopSpin3.5pl6} 2008 16 — 400.13MHz

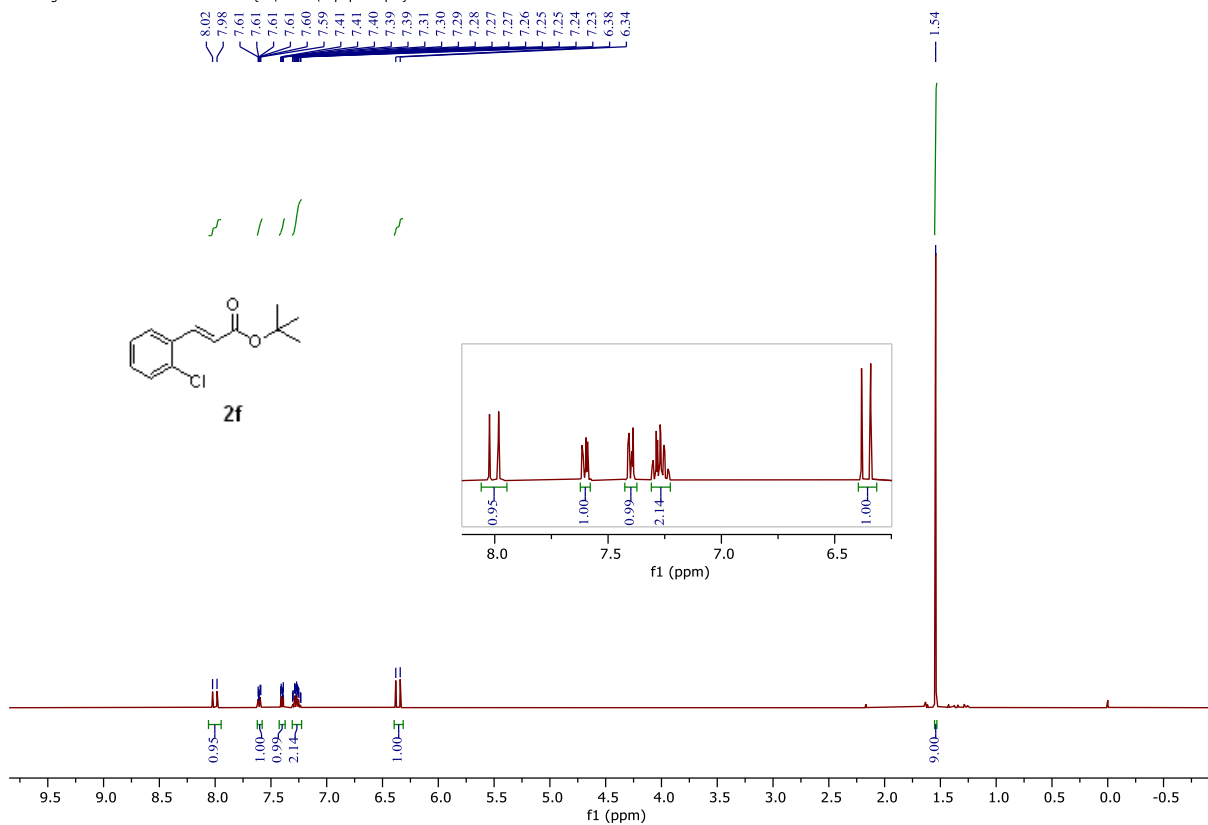

Jianxing Xu JXU-512301  
C13CPD CDCl3 {C:\Bruker\TopSpin3.6.0} 2008 23  
75.49MHz

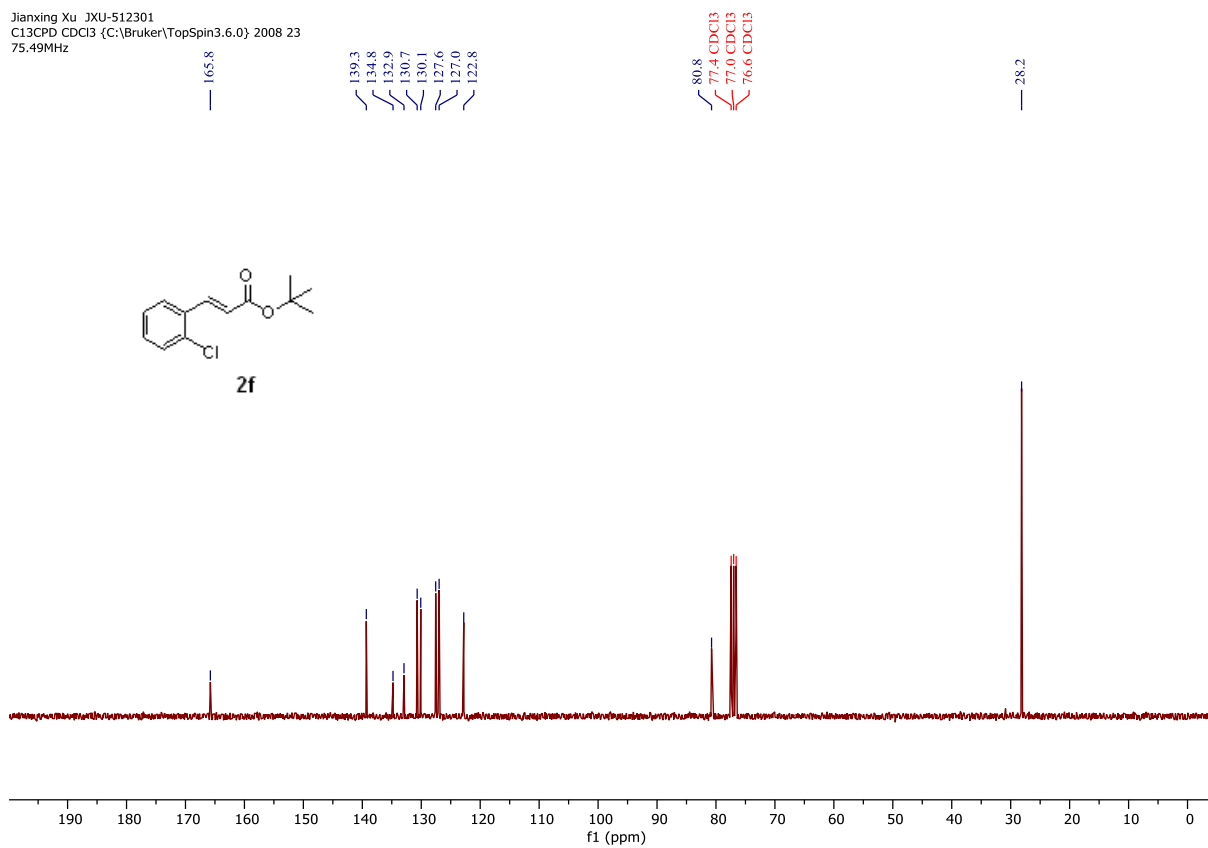

Jianxing Xu, JXU-512501 — Au1H CDCl3 {C:\Bruker\TopSpin3.6.0} 2008 37 — 300.13MHz

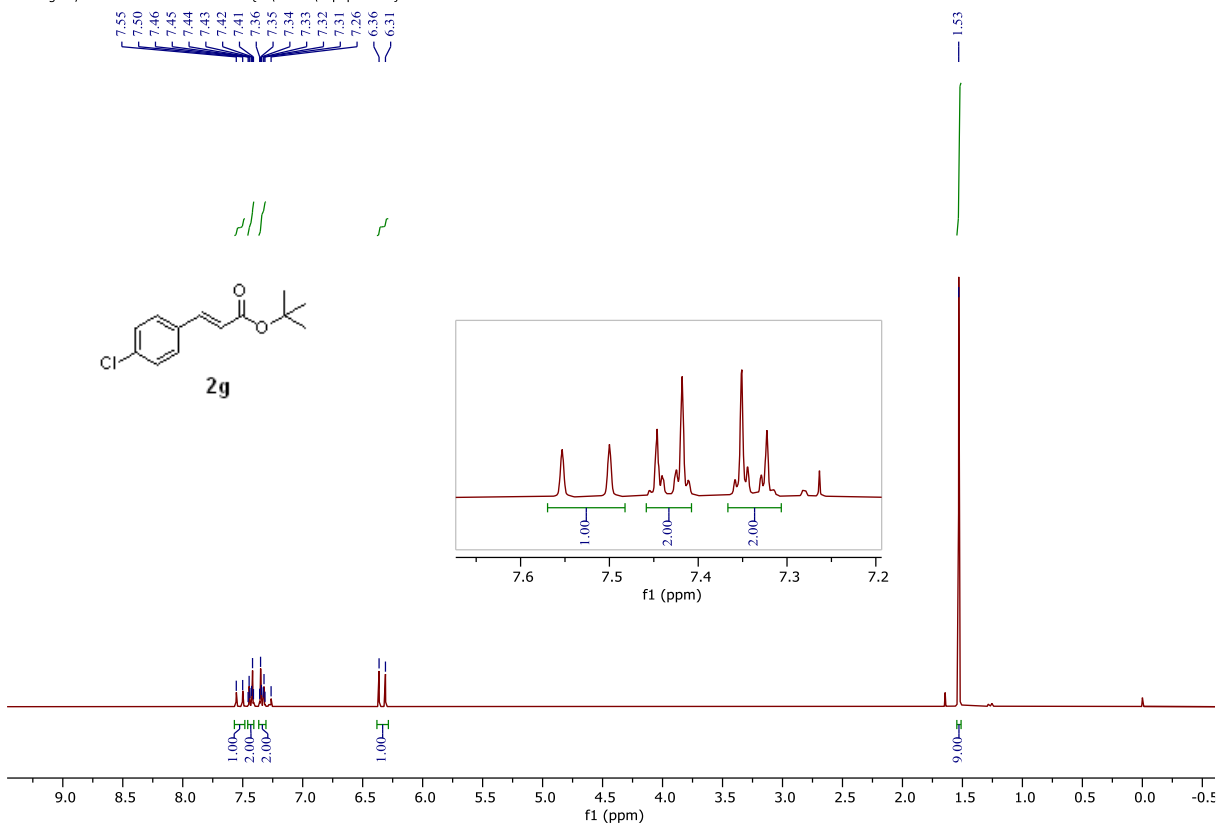

Jianxing Xu, JXU-512501  
Au13C CDCl3 {C:\Bruker\TopSpin3.6.0} 2008 37  
75.48MHz

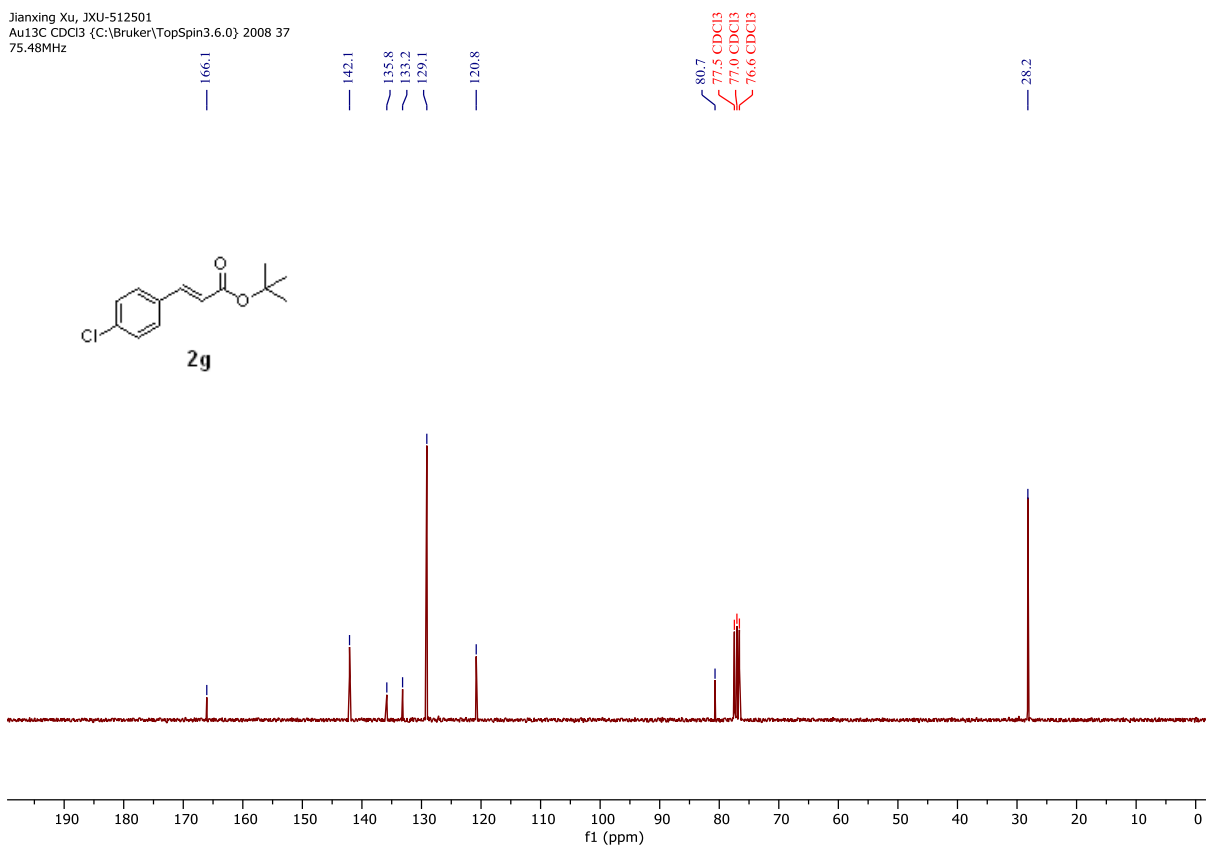

Jianxing Xu, JXU-512503 — Au1H CDCl3 {C:\Bruker\TopSpin3.6.0} 2008 38 — 300.13MHz

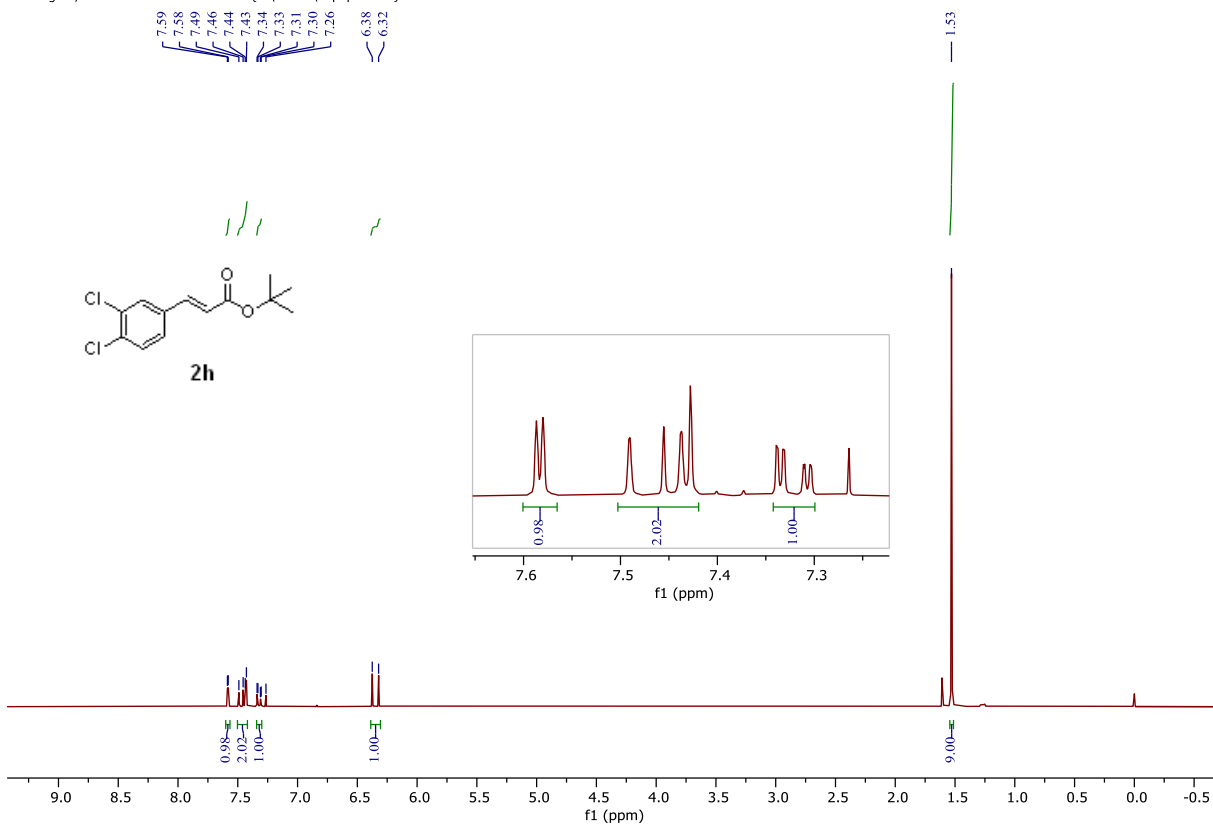

Jianxing Xu, JXU-512503  
Au13C CDCl3 {C:\Bruker\TopSpin3.6.0} 2008 38  
75.48MHz

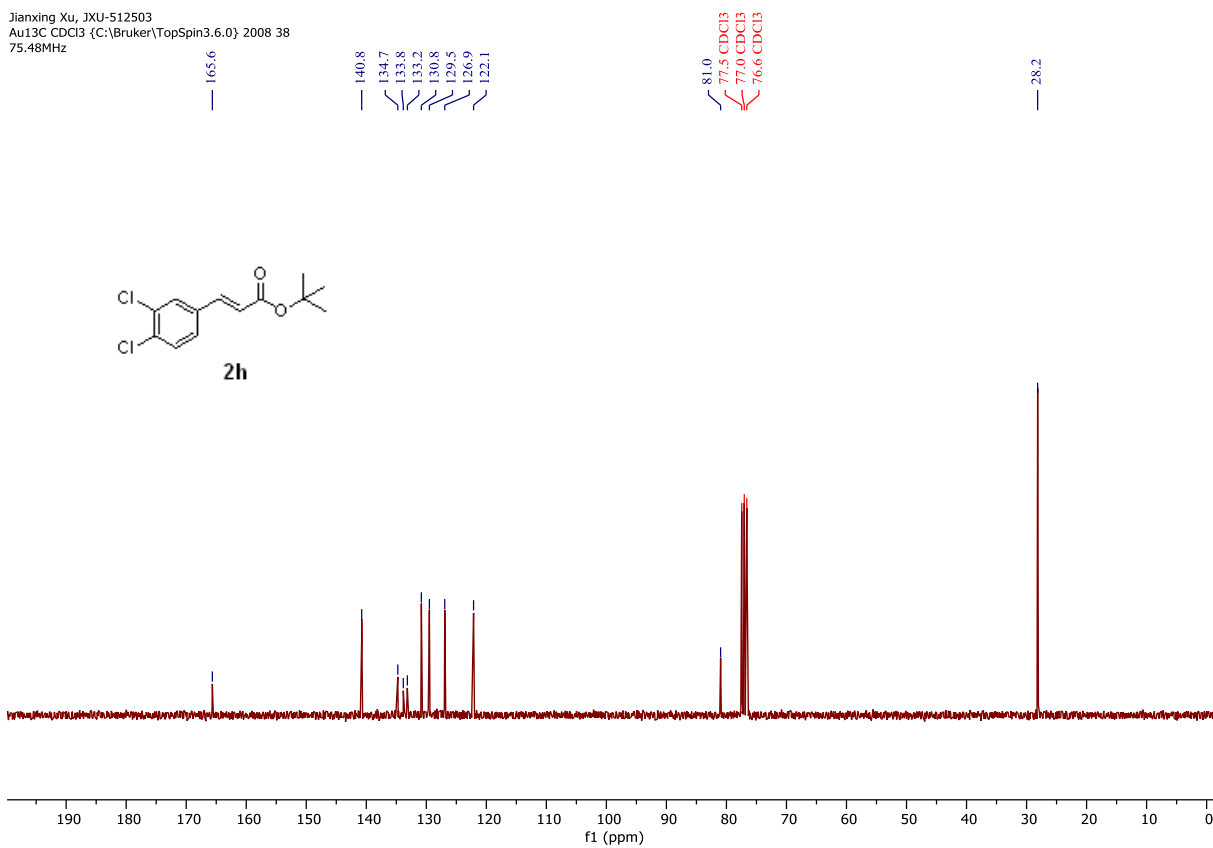

Jianxing Xu JXU-512506 — Au1H CDCl3 {C:\Bruker\TopSpin3.6.0} 2008 10 — 300.13MHz

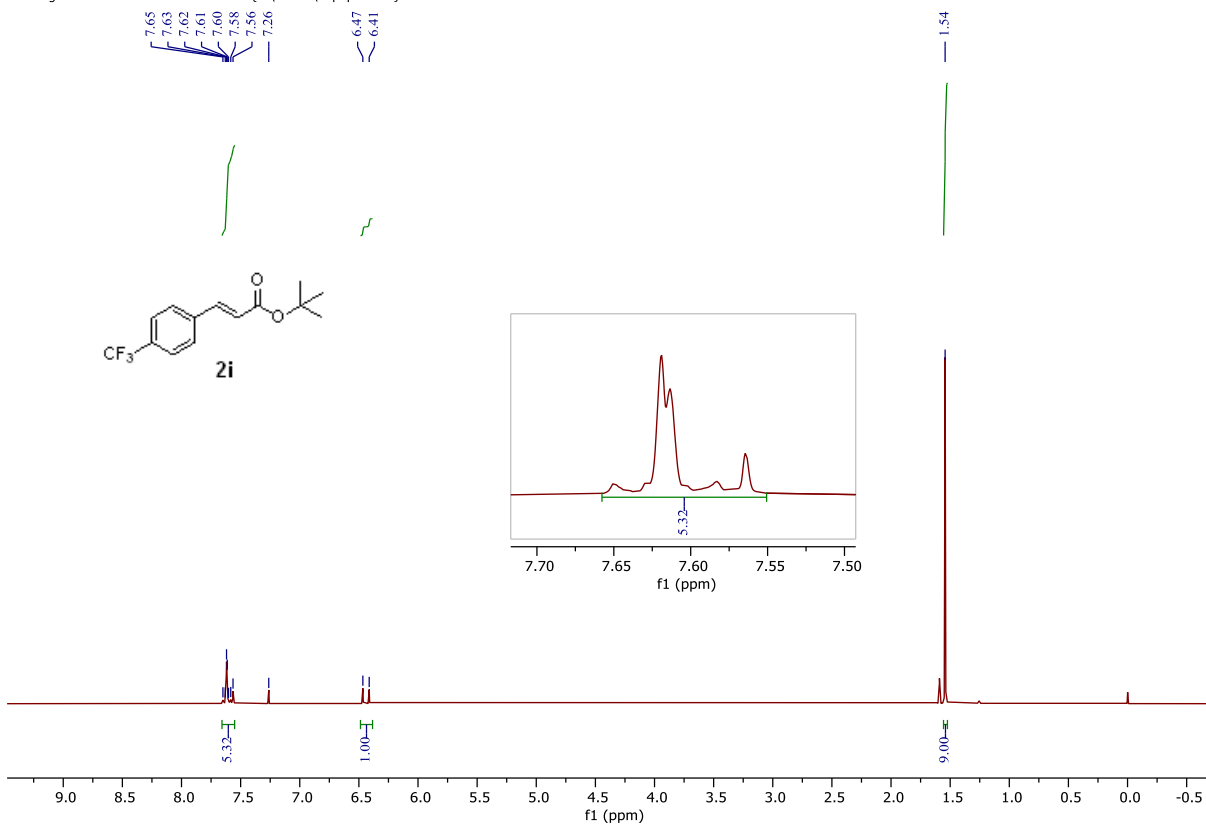

Jianxing Xu, JXu-512506  
C13CPD CDCl3 {C:\Bruker\TopSpin3.6.0} 2008 4  
75.49MHz

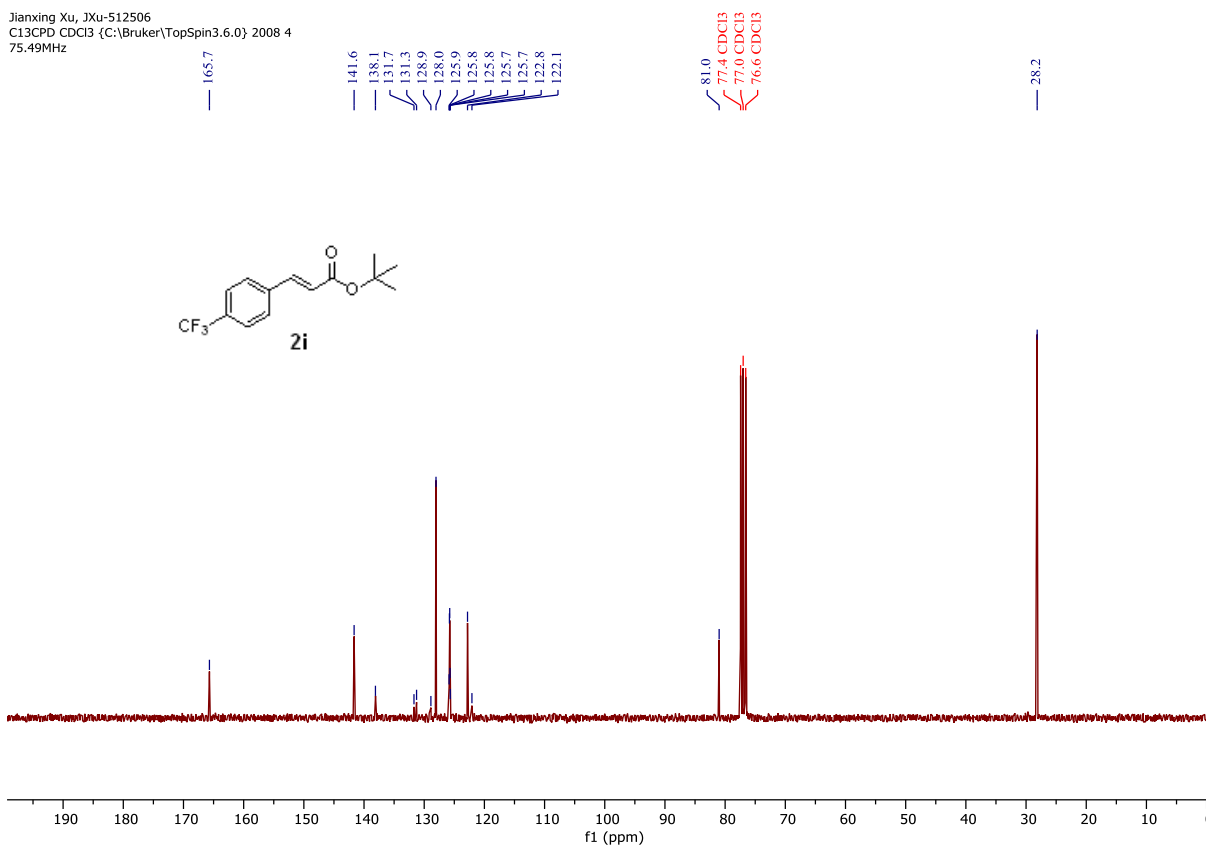



Jianxing Xu, JXu-512704 — PROTON CDCl3 {C:\Bruker\TopSpin3.6.0} 2008 6 — 300.20MHz

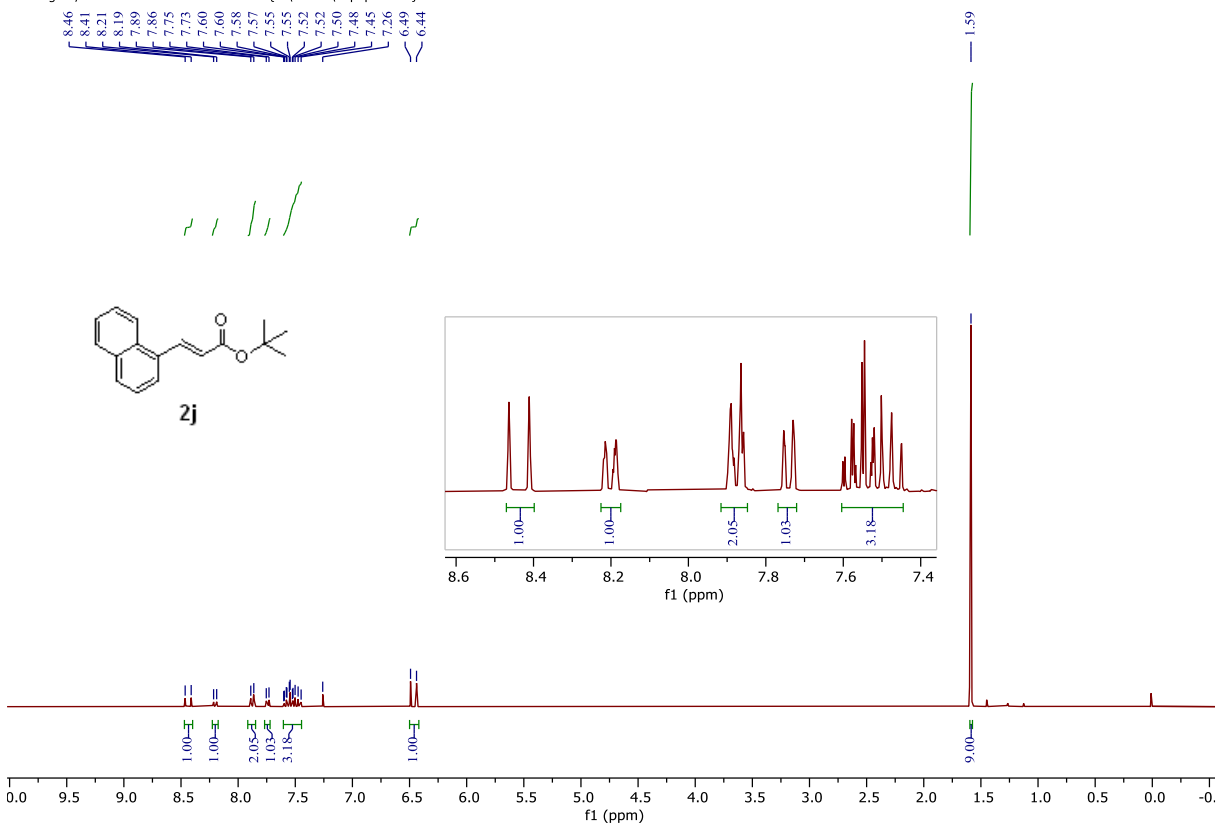

Jianxing Xu, JXu-512704  
C13CPD CDCl3 {C:\Bruker\TopSpin3.6.0} 2008 6  
75.49MHz

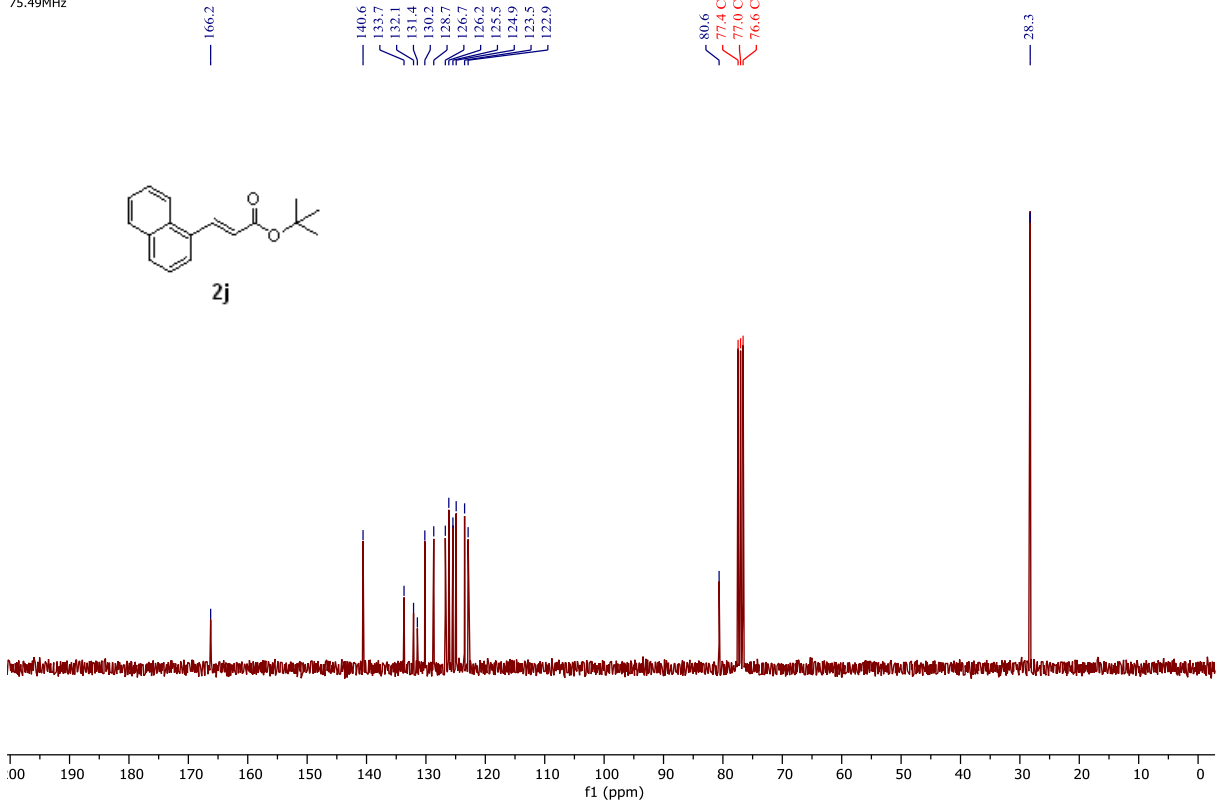

Jianxing Xu JXU-512505 — Au1H CDCl3 {C:\Bruker\TopSpin3.6.0} 2008 9 — 300.13MHz

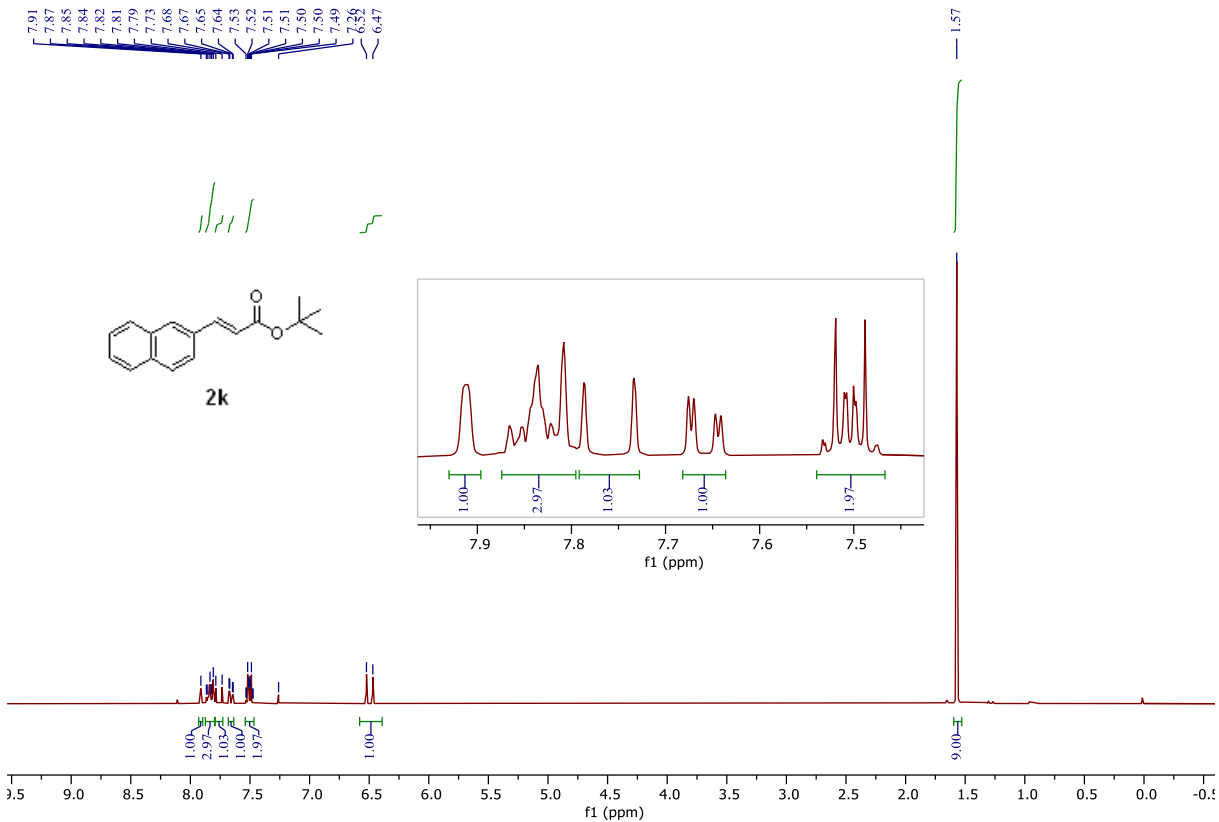

Jianxing Xu JXU-512505  
Au13C CDCl3 {C:\Bruker\TopSpin3.6.0} 2008 17  
75.48MHz

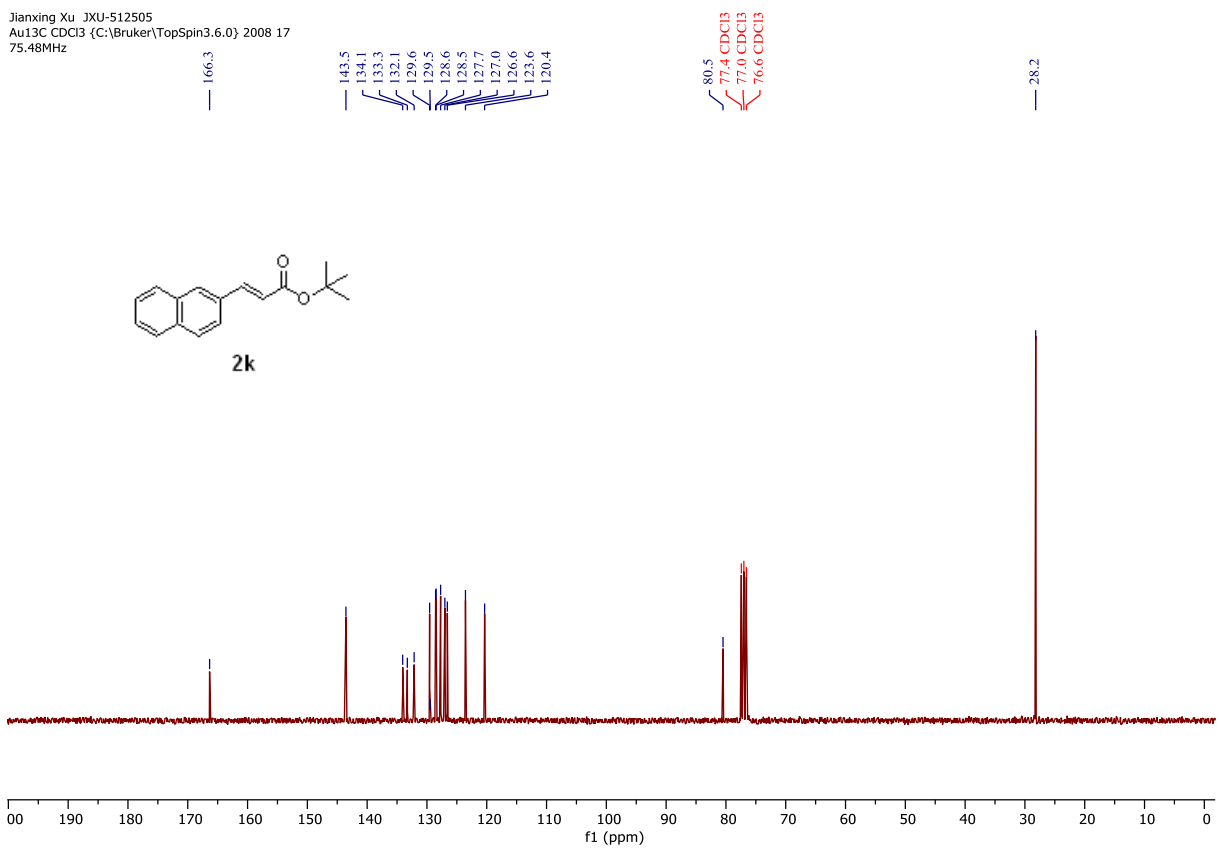

Jianxing Xu JXU-511902 — PROTON CDCl3 {C:\Bruker\TopSpin3.6.0} 2008 11 — 300.20MHz

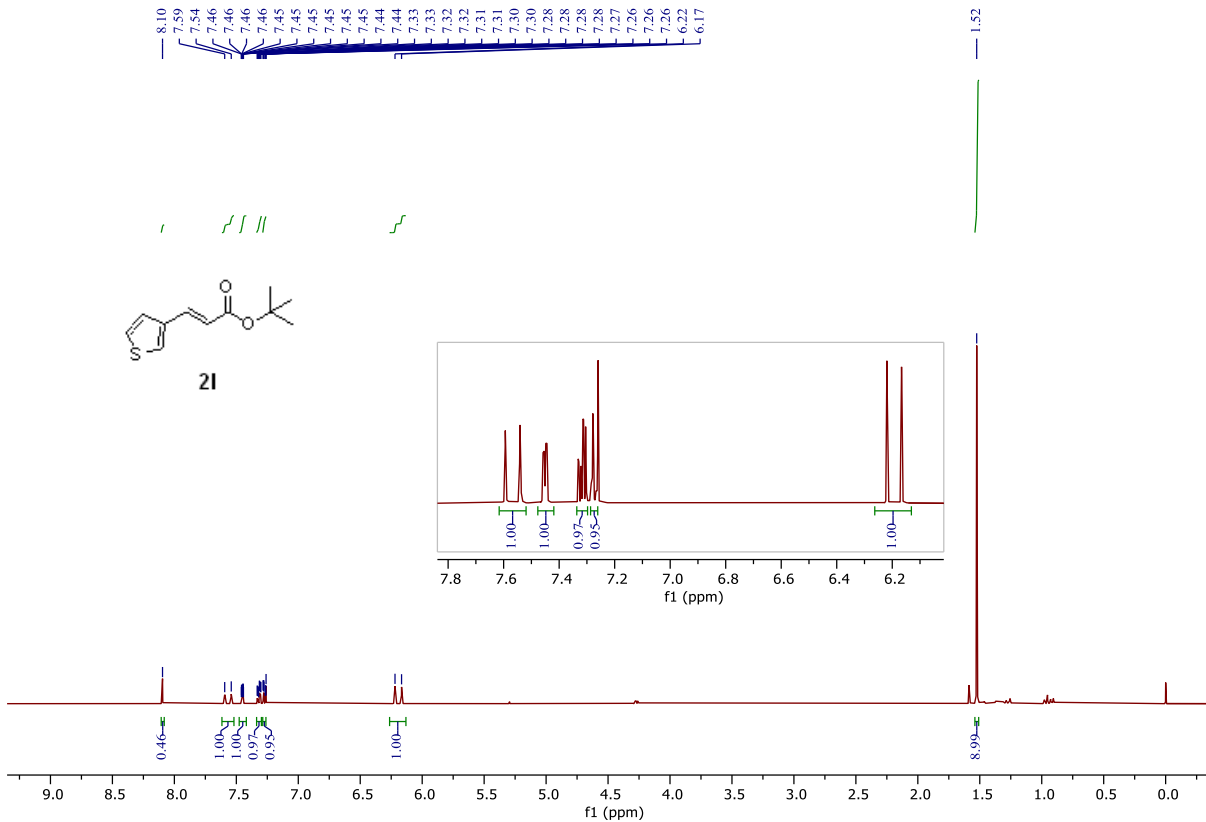

Jianxing Xu, JXU-511902  
C13CPD CDCl3 {C:\Bruker\TopSpin3.6.0} 2008 3  
75.49MHz

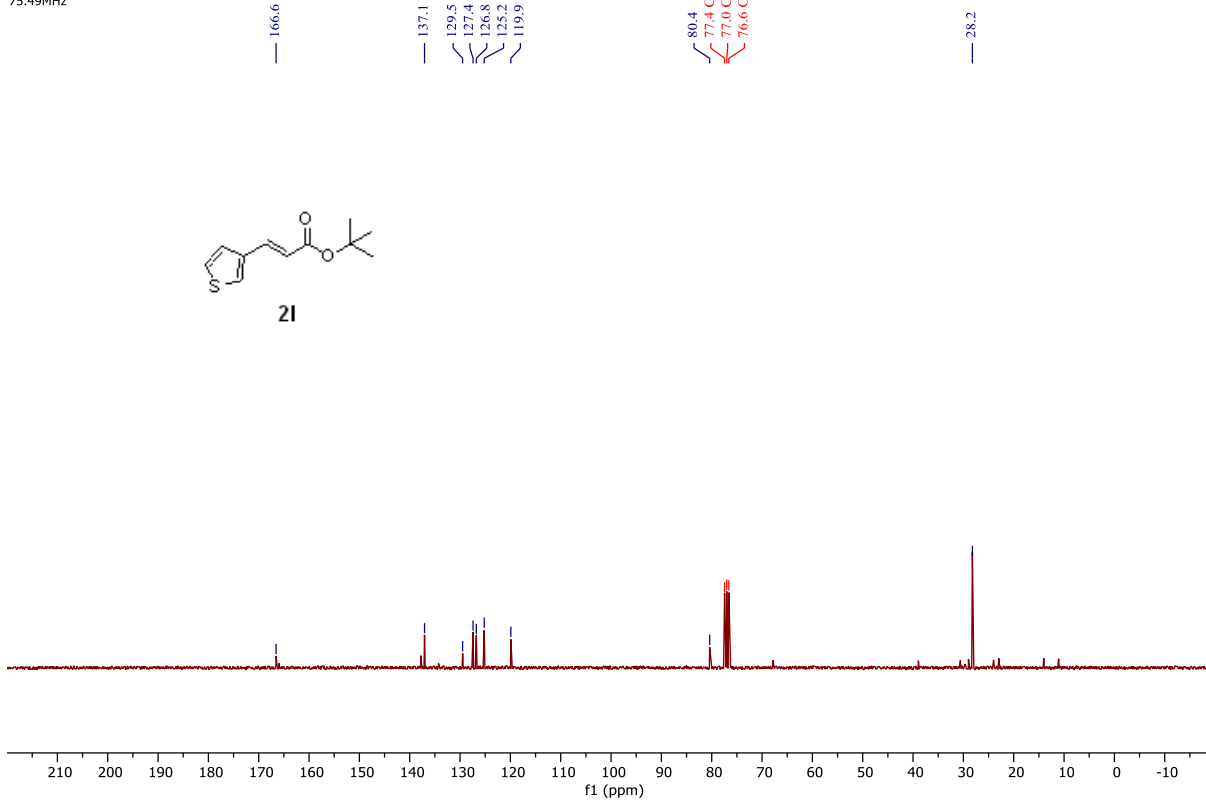

Jianxing Xu JXU-512001 — Au1H CDCl3 {C:\Bruker\TopSpin3.6.0} 2008 11 — 300.13MHz

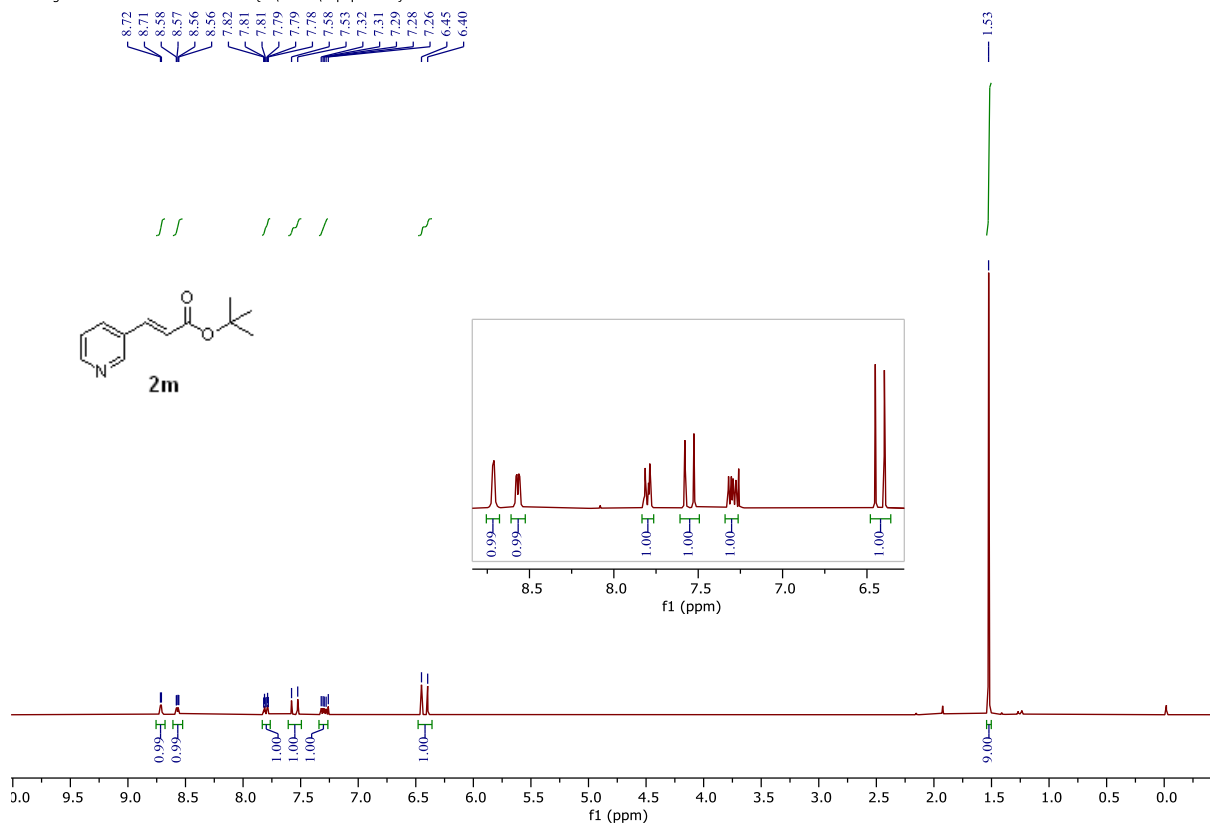

Jianxing Xu JXU-512001  
Au13C CDCl3 {C:\Bruker\TopSpin3.6.0} 2008 12  
75.48MHz

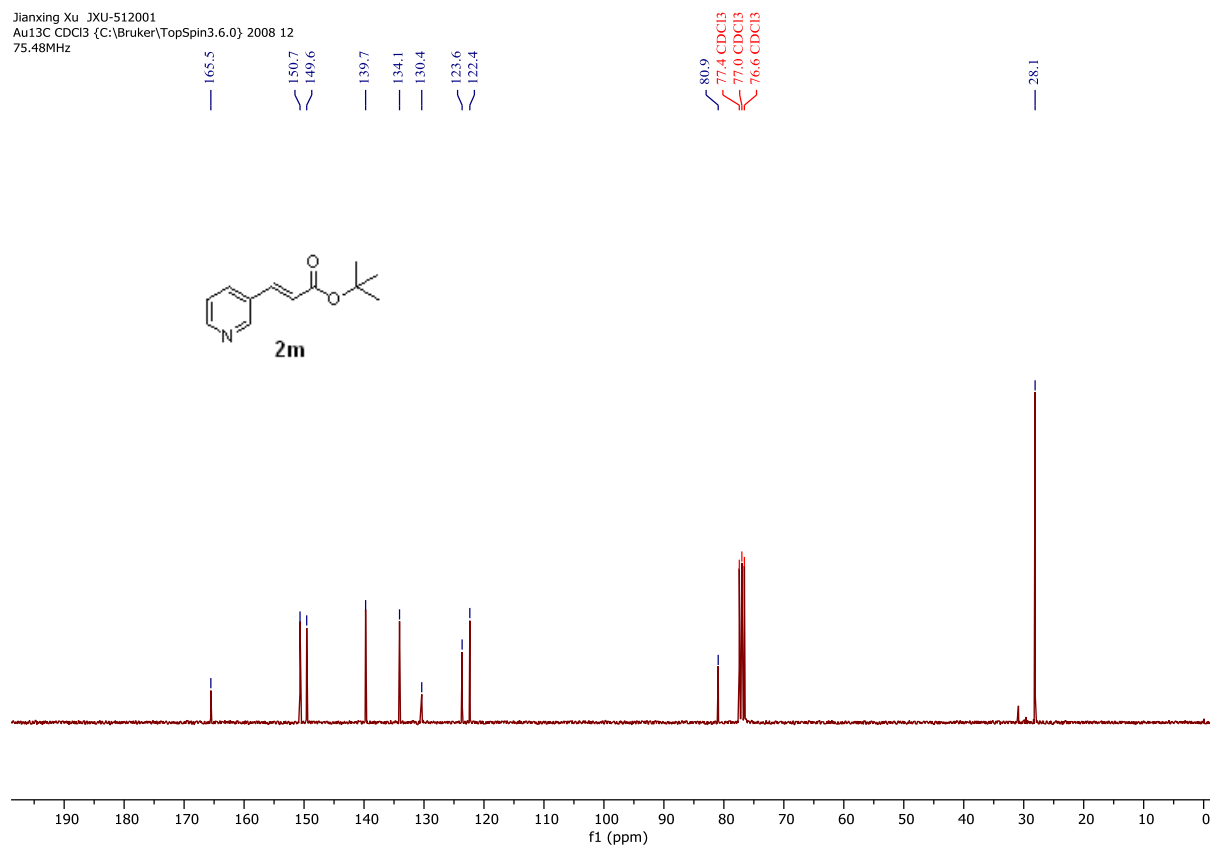

Supplement: d0ob02043e1.pdf [file d0ob02043e1.pdf]
